# Supplementary material for: Parkinson’s disease causality and heterogeneity: a proteogenomic view
Source: bioRxiv or medRxiv preprint supplement (doi:10.1101/2022.03.09.22272131), 2022-06-14
Supplement: Supplementary file [file media-1.pdf]

## Supplementary material

### Supplementary Table 1

| Mendelian randomization using low linkage disequilibrium (LD) threshold |               |            |         |                        |                          |                                               |
|-------------------------------------------------------------------------|---------------|------------|---------|------------------------|--------------------------|-----------------------------------------------|
| Protein                                                                 | Number of IVs | Method     | $\beta$ | Nominal p-value        | Colocalization PP.H4.abf | Horizontal Pleiotropy Test (MRPRESSO p-value) |
| GPNMB <sup>1,2</sup>                                                    | 11            | IVW        | 0.14    | $1.39 \times 10^{-20}$ | 0.94                     | 0.65                                          |
| FCGR2B <sup>2</sup>                                                     | 17            | IVW        | 0.07    | $2.43 \times 10^{-16}$ | 0.96                     | 0.49                                          |
| FCGR2A <sup>2</sup>                                                     | 18            | IVW        | 0.07    | $1.93 \times 10^{-14}$ | 0.95                     | 0.26                                          |
| CTSB <sup>2</sup>                                                       | 12            | IVW        | -0.11   | $2.19 \times 10^{-12}$ | 0.22                     | 0.47                                          |
| CD38 <sup>2</sup>                                                       | 1             | Wald ratio | -0.53   | $2.62 \times 10^{-11}$ | 0.45                     | NA                                            |
| HP <sup>2</sup>                                                         | 19            | IVW        | 0.06    | $2.38 \times 10^{-8}$  | 0.01                     | 0.60                                          |
| LTF <sup>2</sup>                                                        | 23            | IVW        | 0.05    | $2.82 \times 10^{-8}$  | 0.04                     | 0.65                                          |
| HLA-DQA2 <sup>3,2</sup>                                                 | 33            | IVW        | -0.14   | $1.20 \times 10^{-7}$  | 0.03                     | 0.00                                          |
| HAVCR2 <sup>2</sup>                                                     | 13            | IVW        | -0.10   | $4.77 \times 10^{-7}$  | 0.30                     | 0.67                                          |
| CLEC3B <sup>2</sup>                                                     | 4             | IVW        | -0.16   | $1.94 \times 10^{-6}$  | 0.29                     | 0.97                                          |
| BST1 <sup>3,2</sup>                                                     | 10            | IVW        | 0.12    | $2.63 \times 10^{-6}$  | 0.24                     | 0.00                                          |
| HAPLN1 <sup>2</sup>                                                     | 15            | IVW        | 0.06    | $7.24 \times 10^{-6}$  | 0.05                     | 0.79                                          |
| MANEA <sup>2</sup>                                                      | 17            | IVW        | 0.05    | $7.26 \times 10^{-6}$  | 0.10                     | 0.94                                          |
| NQO2 <sup>2</sup>                                                       | 11            | IVW        | 0.05    | $7.63 \times 10^{-6}$  | 0.05                     | 0.98                                          |
| ARSA <sup>1,2</sup>                                                     | 5             | IVW        | 0.13    | $1.70 \times 10^{-5}$  | 0.58                     | 0.62                                          |
| LGALS3 <sup>2</sup>                                                     | 8             | IVW        | 0.07    | $1.86 \times 10^{-5}$  | 0.02                     | 0.50                                          |
| PAM <sup>2</sup>                                                        | 12            | IVW        | 0.09    | $2.64 \times 10^{-5}$  | 0.08                     | 0.47                                          |
| IL1RL1 <sup>2</sup>                                                     | 26            | IVW        | 0.03    | $2.75 \times 10^{-5}$  | 0.01                     | 0.90                                          |

|                      |     |     |       |                       |      |      |
|----------------------|-----|-----|-------|-----------------------|------|------|
| TPSAB1 <sup>2</sup>  | 8   | IVW | -0.06 | $3.22 \times 10^{-5}$ | 0.15 | 0.80 |
| HSP90B1 <sup>2</sup> | 22  | IVW | 0.04  | $3.50 \times 10^{-5}$ | 0.03 | 0.19 |
| GLCE <sup>2</sup>    | 14  | IVW | 0.05  | $4.84 \times 10^{-5}$ | 0.10 | 0.96 |
| MANSC4 <sup>2</sup>  | 18  | IVW | 0.05  | $5.20 \times 10^{-5}$ | 0.02 | 0.85 |
| ICAM1 <sup>2</sup>   | 8   | IVW | -0.07 | $7.29 \times 10^{-5}$ | 0.32 | 0.74 |
| RABEPK <sup>2</sup>  | 10  | IVW | -0.05 | $7.33 \times 10^{-5}$ | 0.10 | 0.86 |
| SIRPB1 <sup>2</sup>  | 25  | IVW | -0.03 | $9.11 \times 10^{-5}$ | 0.01 | 0.60 |
| CLN5 <sup>1,2</sup>  | 2   | IVW | -0.15 | $1.19 \times 10^{-4}$ | 0.38 | NA   |
| IL9 <sup>2</sup>     | 12  | IVW | 0.06  | $1.21 \times 10^{-4}$ | 0.05 | 0.96 |
| PCSK7 <sup>2</sup>   | 18  | IVW | -0.04 | $1.21 \times 10^{-4}$ | 0.02 | 0.98 |
| AGT <sup>2</sup>     | 4   | IVW | 0.12  | $1.77 \times 10^{-4}$ | 0.06 | 0.97 |
| CD274 <sup>2</sup>   | 16  | IVW | 0.08  | $1.96 \times 10^{-4}$ | 0.02 | 0.46 |
| RBP7 <sup>2</sup>    | 3   | IVW | 0.20  | $2.23 \times 10^{-4}$ | 0.09 | NA   |
| C4B <sup>3,2,4</sup> | 101 | IVW | 0.02  | $2.85 \times 10^{-4}$ | 0.00 | 0.00 |
| PLA2G7 <sup>2</sup>  | 14  | IVW | 0.04  | $2.96 \times 10^{-4}$ | 0.05 | 0.57 |
| C4A <sup>3,2,4</sup> | 101 | IVW | 0.02  | $3.76 \times 10^{-4}$ | 0.00 | 0.00 |
| ASIP <sup>2</sup>    | 3   | IVW | -0.13 | $5.13 \times 10^{-4}$ | 0.17 | NA   |
| EGF <sup>2</sup>     | 3   | IVW | -0.13 | $5.23 \times 10^{-4}$ | 0.11 | NA   |
| TPSB2 <sup>2</sup>   | 10  | IVW | -0.05 | $5.96 \times 10^{-4}$ | 0.15 | 0.27 |
| RNASE3 <sup>2</sup>  | 6   | IVW | 0.09  | $6.14 \times 10^{-4}$ | 0.01 | 0.26 |
| ACP1 <sup>2</sup>    | 15  | IVW | 0.04  | $6.25 \times 10^{-4}$ | 0.04 | 0.88 |
| A4GALT <sup>2</sup>  | 2   | IVW | -0.21 | $6.62 \times 10^{-4}$ | 0.11 | NA   |
| DSCAM <sup>2</sup>   | 3   | IVW | -0.30 | $8.78 \times 10^{-4}$ | 0.19 | NA   |

|                       |    |            |       |                       |      |      |
|-----------------------|----|------------|-------|-----------------------|------|------|
| LCT <sup>3,2</sup>    | 25 | IVW        | 0.04  | $8.91 \times 10^{-4}$ | 0.00 | 0.00 |
| COLEC11 <sup>2</sup>  | 8  | IVW        | -0.05 | $9.58 \times 10^{-4}$ | 0.03 | 0.61 |
| SPOCK2 <sup>2</sup>   | 8  | IVW        | 0.08  | 0.0010                | 0.03 | 0.98 |
| VWA2 <sup>2</sup>     | 5  | IVW        | -0.11 | 0.0011                | 0.04 | 0.76 |
| ADAMTS4 <sup>2</sup>  | 8  | IVW        | -0.06 | 0.0013                | 0.19 | 0.36 |
| RNASE2 <sup>2</sup>   | 10 | IVW        | 0.06  | 0.0013                | 0.02 | 0.61 |
| PRTN3 <sup>2</sup>    | 2  | IVW        | 0.17  | 0.0013                | 0.06 | NA   |
| RPN1 <sup>2</sup>     | 10 | IVW        | 0.08  | 0.0013                | 0.02 | 0.57 |
| PDCD1LG2 <sup>2</sup> | 12 | IVW        | -0.09 | 0.0013                | 0.04 | 0.07 |
| ADGRE2 <sup>2</sup>   | 10 | IVW        | -0.05 | 0.0013                | 0.01 | 0.87 |
| MPIG6B <sup>2</sup>   | 18 | IVW        | -0.05 | 0.0014                | 0.00 | 0.18 |
| TAPBPL <sup>2</sup>   | 10 | IVW        | -0.03 | 0.0014                | 0.03 | 0.50 |
| SIGLEC9 <sup>2</sup>  | 19 | IVW        | 0.03  | 0.0015                | 0.02 | 0.99 |
| LRP12 <sup>1,2</sup>  | 1  | Wald ratio | 0.73  | 0.0017                | 0.66 | NA   |
| DNAJC30 <sup>2</sup>  | 3  | IVW        | -0.09 | 0.0018                | 0.03 | NA   |
| CCL15 <sup>2</sup>    | 3  | IVW        | -0.08 | 0.0019                | 0.12 | NA   |
| VTN <sup>2</sup>      | 22 | IVW        | -0.03 | 0.0022                | 0.01 | 0.75 |
| NUCB1 <sup>2</sup>    | 3  | IVW        | -0.12 | 0.0023                | 0.05 | NA   |
| TRH <sup>2</sup>      | 4  | IVW        | -0.08 | 0.0023                | 0.07 | 0.75 |
| POSTN <sup>2</sup>    | 8  | IVW        | -0.07 | 0.0028                | 0.02 | 0.76 |
| PLXNB2 <sup>1,2</sup> | 36 | IVW        | -0.02 | 0.0029                | 0.08 | 0.09 |
| IL18R1 <sup>2</sup>   | 23 | IVW        | 0.03  | 0.0029                | 0.01 | 0.79 |
| IDUA <sup>2</sup>     | 3  | IVW        | 0.10  | 0.0033                | 0.00 | NA   |

|                     |    |            |       |        |      |      |
|---------------------|----|------------|-------|--------|------|------|
| CFD <sup>2</sup>    | 10 | IVW        | -0.05 | 0.0035 | 0.01 | 0.58 |
| GGH <sup>1,2</sup>  | 4  | IVW        | 0.08  | 0.0035 | 0.02 | 0.49 |
| FGFRL1 <sup>2</sup> | 5  | IVW        | 0.13  | 0.0041 | 0.00 | 0.07 |
| LMAN2L <sup>2</sup> | 3  | IVW        | -0.15 | 0.0045 | 0.03 | NA   |
| TXNDC15             | 6  | IVW        | -0.05 | 0.0048 | 0.12 | 0.46 |
| KNG1                | 6  | IVW        | 0.05  | 0.0050 | 0.03 | 0.80 |
| EPHA1               | 6  | IVW        | 0.05  | 0.0050 | 0.08 | 0.98 |
| CCL23               | 2  | IVW        | 0.10  | 0.0054 | 0.03 | NA   |
| JAML                | 13 | IVW        | -0.02 | 0.0055 | 0.03 | 0.86 |
| CLEC7A              | 5  | IVW        | 0.05  | 0.0059 | 0.09 | 0.87 |
| HRG                 | 2  | IVW        | -0.08 | 0.0060 | 0.09 | NA   |
| NUDT9               | 4  | IVW        | -0.08 | 0.0070 | 0.03 | 0.87 |
| CHI3L2              | 11 | IVW        | -0.04 | 0.0072 | 0.04 | 0.45 |
| OAS1                | 5  | IVW        | 0.08  | 0.0080 | 0.02 | 0.41 |
| TNFRSF11A           | 12 | IVW        | -0.06 | 0.0082 | 0.02 | 0.99 |
| NDNF                | 4  | IVW        | -0.10 | 0.0083 | 0.01 | 0.32 |
| INPP5B              | 6  | IVW        | -0.08 | 0.0096 | 0.01 | 0.43 |
| GRN <sup>1</sup>    | 1  | Wald ratio | -0.19 | 0.0097 | 0.22 | NA   |
| WFIKKN2             | 10 | IVW        | 0.03  | 0.010  | 0.00 | 0.70 |
| ROR2                | 4  | IVW        | 0.13  | 0.010  | 0.01 | 0.42 |
| H6PD                | 6  | IVW        | -0.07 | 0.010  | 0.05 | 0.92 |
| GFRAL               | 8  | IVW        | 0.05  | 0.012  | 0.04 | 0.97 |
| BTN2A1              | 12 | IVW        | 0.07  | 0.013  | 0.00 | 0.19 |

|                    |    |            |       |       |      |      |
|--------------------|----|------------|-------|-------|------|------|
| MMP2               | 5  | IVW        | -0.08 | 0.014 | 0.03 | 0.96 |
| PGD                | 2  | IVW        | 0.23  | 0.014 | 0.48 | NA   |
| NPW <sup>3</sup>   | 7  | IVW        | 0.09  | 0.014 | 0.00 | 0.02 |
| AMY2B              | 2  | IVW        | 0.19  | 0.015 | 0.03 | NA   |
| IL6R               | 15 | IVW        | 0.03  | 0.016 | 0.00 | 0.09 |
| GSN                | 6  | IVW        | -0.06 | 0.016 | 0.03 | 0.98 |
| TBL2               | 4  | IVW        | -0.07 | 0.016 | 0.08 | 0.98 |
| TMEM9              | 18 | IVW        | -0.04 | 0.018 | 0.01 | 0.43 |
| LAMC2              | 11 | IVW        | -0.03 | 0.018 | 0.04 | 0.58 |
| TDGF1 <sup>3</sup> | 19 | IVW        | -0.03 | 0.019 | 0.00 | 0.01 |
| PPIE               | 7  | IVW        | 0.07  | 0.020 | 0.03 | 0.96 |
| CCN3               | 3  | IVW        | -0.09 | 0.020 | 0.03 | NA   |
| EFEMP1             | 13 | IVW        | 0.05  | 0.020 | 0.01 | 0.42 |
| B3GLCT             | 3  | IVW        | -0.09 | 0.020 | 0.03 | NA   |
| ESD                | 3  | IVW        | -0.04 | 0.021 | 0.09 | NA   |
| TNFRSF14           | 9  | IVW        | -0.07 | 0.021 | 0.03 | 0.80 |
| ACP5               | 6  | IVW        | 0.05  | 0.021 | 0.04 | 0.88 |
| TEK                | 9  | IVW        | -0.05 | 0.021 | 0.04 | 0.71 |
| SEMA3E             | 9  | IVW        | -0.04 | 0.022 | 0.02 | 0.90 |
| WARS1              | 2  | IVW        | 0.12  | 0.022 | 0.19 | NA   |
| TIE1               | 1  | Wald ratio | -0.18 | 0.022 | 0.09 | NA   |
| QPCT               | 6  | IVW        | 0.06  | 0.023 | 0.03 | 0.51 |
| FABP6 <sup>3</sup> | 9  | IVW        | 0.08  | 0.024 | 0.01 | 0.01 |

|                    |    |            |       |       |      |      |
|--------------------|----|------------|-------|-------|------|------|
| CNTN2              | 9  | IVW        | 0.05  | 0.025 | 0.00 | 0.26 |
| PPT1               | 6  | IVW        | 0.05  | 0.026 | 0.01 | 0.76 |
| MBL2               | 10 | IVW        | 0.04  | 0.027 | 0.02 | 0.66 |
| CPA4               | 11 | IVW        | -0.03 | 0.027 | 0.01 | 0.18 |
| LY86               | 3  | IVW        | -0.08 | 0.027 | 0.03 | NA   |
| CCL16              | 2  | IVW        | 0.05  | 0.028 | 0.06 | NA   |
| MCEE               | 5  | IVW        | -0.05 | 0.031 | 0.01 | 1.00 |
| IFNAR1             | 6  | IVW        | -0.05 | 0.031 | 0.02 | 0.55 |
| NQO1               | 14 | IVW        | 0.03  | 0.032 | 0.03 | 0.18 |
| ICAM4              | 1  | Wald ratio | 0.32  | 0.033 | 0.09 | NA   |
| TRIL               | 2  | IVW        | -0.08 | 0.034 | 0.03 | NA   |
| ADAMTS5            | 12 | IVW        | -0.03 | 0.034 | 0.01 | 0.69 |
| THBS3              | 2  | IVW        | 0.08  | 0.034 | 0.00 | NA   |
| BTN3A1             | 24 | IVW        | -0.02 | 0.035 | 0.00 | 0.83 |
| MXRA7              | 6  | IVW        | -0.12 | 0.037 | 0.10 | 0.18 |
| TNFRSF10B          | 5  | IVW        | 0.09  | 0.038 | 0.02 | 0.24 |
| FKBP7              | 12 | IVW        | 0.04  | 0.038 | 0.01 | 0.95 |
| AKR1B1             | 1  | Wald ratio | 0.23  | 0.039 | 0.06 | NA   |
| TAPBP              | 4  | IVW        | -0.07 | 0.039 | 0.00 | 0.62 |
| BCHE               | 2  | IVW        | 0.12  | 0.040 | 0.02 | NA   |
| RSPO4 <sup>1</sup> | 1  | Wald ratio | 0.15  | 0.041 | 0.06 | NA   |
| CST5               | 11 | IVW        | -0.04 | 0.041 | 0.02 | 0.15 |
| MAX                | 1  | Wald ratio | 0.17  | 0.042 | 0.05 | NA   |

|         |   |     |       |       |      |      |
|---------|---|-----|-------|-------|------|------|
| IL15RA  | 3 | IVW | -0.08 | 0.045 | 0.02 | NA   |
| INSR    | 2 | IVW | 0.24  | 0.045 | 0.07 | NA   |
| IL10RB  | 6 | IVW | -0.04 | 0.047 | 0.01 | 0.92 |
| LILRA4  | 6 | IVW | -0.07 | 0.048 | 0.02 | 0.21 |
| FAH     | 2 | IVW | 0.11  | 0.048 | 0.03 | NA   |
| B3GNT8  | 5 | IVW | -0.03 | 0.049 | 0.02 | 0.99 |
| F11     | 3 | IVW | -0.08 | 0.049 | 0.02 | NA   |
| SIGLEC7 | 7 | IVW | 0.03  | 0.050 | 0.03 | 0.99 |
| MAN2B2  | 6 | IVW | -0.02 | 0.050 | 0.01 | 0.65 |

<sup>1</sup> PD protein marker in Supplementary Table 3

<sup>2</sup> passed FDR correction

<sup>3</sup> corrected by removing outlier by MRPRESSO

<sup>4</sup> has homolog detected by the same SOMAmer

MAF>0.05, cis-pQTL  $p < 5e-08$ , F-statistic>10, clumped by  $r^2 < 0.3$  for SNPs within 1000kb region

744 proteins have a significant cis-pQTL

Supplementary Table 2

**Mendelian randomization using high LD threshold**

| Protein               | Number of IVs | Method     | $\beta$ | Nominal p-value        | Colocalization PP.H4.abf |
|-----------------------|---------------|------------|---------|------------------------|--------------------------|
| CD38 <sup>1</sup>     | 1             | Wald ratio | -0.53   | $2.62 \times 10^{-11}$ | 0.45                     |
| GPNMB <sup>2,1</sup>  | 1             | Wald ratio | 0.15    | $1.47 \times 10^{-8}$  | 0.94                     |
| HLA-DQA2 <sup>1</sup> | 2             | IVW        | -0.21   | $1.93 \times 10^{-7}$  | 0.03                     |
| FCGR2A <sup>1</sup>   | 1             | Wald ratio | 0.06    | $4.37 \times 10^{-5}$  | 0.95                     |
| ASIP                  | 2             | IVW        | -0.14   | $7.99 \times 10^{-4}$  | 0.17                     |
| CTSB                  | 1             | Wald ratio | -0.10   | 0.0011                 | 0.20                     |
| ARSA <sup>2</sup>     | 1             | Wald ratio | 0.15    | 0.0012                 | 0.58                     |
| TPSB2                 | 2             | IVW        | -0.06   | 0.0015                 | 0.15                     |
| NCR1                  | 1             | Wald ratio | 0.19    | 0.0015                 | 0.39                     |
| LRP12 <sup>2</sup>    | 1             | Wald ratio | 0.73    | 0.0017                 | 0.66                     |
| HAVCR2                | 2             | IVW        | -0.09   | 0.0027                 | 0.30                     |
| CLN5 <sup>2</sup>     | 1             | Wald ratio | -0.13   | 0.0033                 | 0.38                     |
| CLEC3B                | 1             | Wald ratio | -0.15   | 0.0035                 | 0.29                     |
| ICAM1                 | 1             | Wald ratio | -0.07   | 0.0037                 | 0.32                     |
| DSCAM                 | 1             | Wald ratio | -0.22   | 0.0044                 | 0.19                     |
| PGD                   | 1             | Wald ratio | 0.17    | 0.0052                 | 0.48                     |
| ADAMTS4               | 1             | Wald ratio | -0.07   | 0.0058                 | 0.19                     |
| WARS1                 | 1             | Wald ratio | 0.16    | 0.0060                 | 0.19                     |
| FGFRL1                | 1             | Wald ratio | 0.14    | 0.0071                 | 0.00                     |
| GRN <sup>2</sup>      | 1             | Wald ratio | -0.19   | 0.0097                 | 0.22                     |
| EPHA1                 | 2             | IVW        | 0.06    | 0.010                  | 0.08                     |
| SIGLEC6               | 1             | Wald ratio | 0.27    | 0.014                  | 0.19                     |
| AGT                   | 1             | Wald ratio | 0.14    | 0.015                  | 0.06                     |
| PAM                   | 1             | Wald ratio | 0.09    | 0.015                  | 0.08                     |



|                     |   |            |       |       |      |
|---------------------|---|------------|-------|-------|------|
| LTF                 | 1 | Wald ratio | 0.04  | 0.016 | 0.04 |
| PLXNB2 <sup>2</sup> | 1 | Wald ratio | -0.03 | 0.019 | 0.08 |
| A4GALT              | 1 | Wald ratio | -0.17 | 0.019 | 0.11 |
| TXNDC15             | 1 | Wald ratio | -0.05 | 0.020 | 0.12 |
| EGF                 | 1 | Wald ratio | -0.11 | 0.021 | 0.11 |
| HRG                 | 1 | Wald ratio | -0.09 | 0.021 | 0.09 |
| TIE1                | 1 | Wald ratio | -0.18 | 0.022 | 0.09 |
| BST1                | 2 | IVW        | 0.10  | 0.023 | 0.24 |
| RABEPK              | 1 | Wald ratio | -0.05 | 0.023 | 0.10 |
| MXRA7               | 1 | Wald ratio | -0.14 | 0.024 | 0.10 |
| GLCE                | 1 | Wald ratio | 0.04  | 0.025 | 0.10 |
| S100A7              | 1 | Wald ratio | 0.08  | 0.026 | 0.16 |
| ESD                 | 1 | Wald ratio | -0.05 | 0.030 | 0.09 |
| CCN3                | 2 | IVW        | -0.09 | 0.032 | 0.03 |
| MANEA               | 3 | IVW        | 0.04  | 0.032 | 0.10 |
| ICAM4               | 1 | Wald ratio | 0.32  | 0.033 | 0.09 |
| FBP2                | 1 | Wald ratio | -0.17 | 0.035 | 0.05 |
| CCL15               | 1 | Wald ratio | -0.07 | 0.037 | 0.12 |
| PLA2G7              | 1 | Wald ratio | 0.05  | 0.039 | 0.05 |
| AKR1B1              | 1 | Wald ratio | 0.23  | 0.039 | 0.06 |
| IDUA                | 1 | Wald ratio | 0.05  | 0.039 | 0.00 |
| HP                  | 2 | IVW        | 0.05  | 0.039 | 0.01 |
| C1QL1               | 2 | IVW        | 0.10  | 0.040 | 0.00 |
| CCL23               | 2 | IVW        | 0.08  | 0.040 | 0.03 |
| RSPO4 <sup>2</sup>  | 1 | Wald ratio | 0.15  | 0.041 | 0.06 |
| MAX                 | 1 | Wald ratio | 0.17  | 0.042 | 0.05 |

|         |   |            |       |       |      |
|---------|---|------------|-------|-------|------|
| ENTPD6  | 2 | IVW        | -0.15 | 0.044 | 0.11 |
| CLEC7A  | 1 | Wald ratio | 0.04  | 0.045 | 0.09 |
| INSR    | 2 | IVW        | 0.24  | 0.045 | 0.07 |
| TMPRSS5 | 1 | Wald ratio | -0.07 | 0.047 | 0.06 |
| H6PD    | 1 | Wald ratio | -0.08 | 0.049 | 0.05 |

<sup>1</sup> passed FDR correction

<sup>2</sup> PD protein marker in Supplementary Table 3

MAF>0.05, cis-pQTL p<5e-08, F-statistic>10, clumped by r<sup>2</sup><0.01 for SNPs within 1000kb region  
744 proteins have a significant cis-pQTL

### Supplementary Table 3

#### Significant differences at proteome level between PD patients (all) and controls (all)

| Gene symbol | PD<br>change<br>direction | p-value<br>(FDR<br>adjusted) |
|-------------|---------------------------|------------------------------|
| LPO         | -                         | 2.35E-08                     |
| SEMG2       | -                         | 9.67E-08                     |
| DLK1        | -                         | 1.76E-07                     |
| RIPK2       | -                         | 3.91E-07                     |
| HAMP        | +                         | 4.35E-05                     |
| NETO1       | -                         | 0.000102                     |
| PLXNB2      | +                         | 0.000462                     |
| BRICD5      | -                         | 0.001051                     |
| ADM         | -                         | 0.001051                     |
| UNC5D       | -                         | 0.001051                     |
| SCUBE1      | +                         | 0.001051                     |
| CTSO        | +                         | 0.001051                     |
| VEGFA       | -                         | 0.001194                     |
| DDR1        | +                         | 0.001278                     |
| GPI         | +                         | 0.001637                     |
| VWC2L       | -                         | 0.001637                     |
| CNTFR       | +                         | 0.001675                     |
| TMEM106A    | +                         | 0.001677                     |
| MDK         | +                         | 0.001677                     |
| VIP         | -                         | 0.001758                     |
| ETS2        | +                         | 0.002165                     |
| SHANK1      | -                         | 0.002165                     |
| PTPRR       | -                         | 0.0022                       |

|            |   |          |
|------------|---|----------|
| MAN1C1     | + | 0.002633 |
| SEMA6A     | + | 0.002633 |
| HS6ST1     | + | 0.003654 |
| TENM4      | - | 0.005513 |
| FRZB       | + | 0.007481 |
| ARSA       | + | 0.00758  |
| DPP7       | + | 0.007713 |
| FAM171B    | + | 0.0078   |
| CREG1      | + | 0.0078   |
| OCRL       | - | 0.008084 |
| CNTN1      | + | 0.008084 |
| PRDX3      | + | 0.008084 |
| DPYSL5     | + | 0.008702 |
| EPHA5      | - | 0.008702 |
| IL17D      | + | 0.008702 |
| CHST5      | + | 0.008702 |
| FZD10      | - | 0.008833 |
| ARTN       | - | 0.009029 |
| EFNB3      | - | 0.00905  |
| SMIM24     | - | 0.010148 |
| NPTX2      | - | 0.010602 |
| LRP12      | - | 0.010602 |
| CD109      | + | 0.011177 |
| IFNGR1     | + | 0.011649 |
| CDH1       | + | 0.011698 |
| GCH1       | + | 0.012095 |
| CCL14      | + | 0.012095 |
| AK1        | + | 0.012095 |
| SPINK9     | - | 0.012095 |
| GXYLT1     | + | 0.012095 |
| NEFH       | + | 0.012095 |
| HGF        | + | 0.014726 |
| ATP1B2     | + | 0.016551 |
| TFPI       | + | 0.016926 |
| FTH1 / FTL | + | 0.016927 |
| MAPK1      | + | 0.01803  |
| TREM2      | + | 0.01803  |
| GPNMB      | + | 0.018467 |
| MEGF10     | - | 0.018744 |
| CPE        | + | 0.018744 |
| NIPAL4     | + | 0.020055 |
| TOPBP1     | - | 0.020083 |
| PLOD3      | + | 0.022023 |
| CLN5       | + | 0.022702 |
| RSPO4      | - | 0.022793 |

|           |   |          |
|-----------|---|----------|
| CDCP1     | + | 0.025844 |
| PTN       | + | 0.026111 |
| OMD       | + | 0.026111 |
| NFASC     | + | 0.026111 |
| SMPD1     | + | 0.027424 |
| MMP8      | - | 0.027424 |
| CHST6     | + | 0.027424 |
| CEL       | + | 0.027828 |
| GNS       | + | 0.030372 |
| C1QTNF1   | + | 0.031093 |
| CA10      | + | 0.032464 |
| IL10      | - | 0.032464 |
| CD209     | - | 0.032464 |
| ACP2      | + | 0.032464 |
| ROBO3     | - | 0.033078 |
| RAF1      | - | 0.035449 |
| SLITRK3   | + | 0.035893 |
| PCSK1     | - | 0.035893 |
| CTSC      | + | 0.035893 |
| CECR1     | + | 0.035893 |
| NDUFB4    | - | 0.036289 |
| SERPINB1  | + | 0.036289 |
| TGFBR3    | + | 0.036289 |
| IGF1R     | + | 0.036339 |
| GZMB      | + | 0.036513 |
| ADAM9     | + | 0.036513 |
| ADAM22    | + | 0.03742  |
| AP2A2     | - | 0.038086 |
| GRN       | + | 0.038086 |
| ADCYAP1   | - | 0.038345 |
| CD44      | - | 0.03897  |
| CLMP      | + | 0.038994 |
| RELT      | - | 0.039338 |
| MATN2     | + | 0.040199 |
| CD2       | + | 0.040199 |
| PCDH9     | + | 0.040243 |
| B3GALT2   | - | 0.040243 |
| PSMB5     | + | 0.040243 |
| DNAJB11   | - | 0.040243 |
| KIAA1549L | + | 0.042606 |
| GGH       | + | 0.043737 |
| BCAN      | + | 0.045398 |
| SIAE      | + | 0.045398 |
| GRAMD1C   | - | 0.045489 |
| LIFR      | + | 0.046539 |

|         |   |          |
|---------|---|----------|
| GRB2    | - | 0.046995 |
| TRAPPC4 | + | 0.046995 |
| SMURF1  | - | 0.04734  |
| CTSH    | + | 0.04734  |
| EPHB6   | - | 0.049035 |
| LARGE1  | + | 0.049035 |
| LYVE1   | - | 0.049406 |
| BTC     | + | 0.049406 |

The change in PD represents (+) increased and (-) decreased in PD vs controls, respectively.  
**Note:** there are 122 proteins tagged by 129 SOMAmers. Duplicated SOMAmers are removed from the table for clarity (the one with the lowest p-value is kept). No discrepancies in directionality were present for duplicated SOMAmers.

Supplementary Table 4

**Significant differences at proteome level between endotypes 1 and 2 of the idiopathic PD subcohort and healthy controls**

| Gene symbol             | PD change direction | p-value (FDR adjusted) |
|-------------------------|---------------------|------------------------|
| <b>Endotype 1 vs HC</b> |                     |                        |
| CNTFR                   | +                   | 0.017796               |
| LPO                     | -                   | 0.000005               |
| MMP10                   | -                   | 0.017796               |
| RIPK2                   | -                   | 0.017796               |
| VEGFA                   | -                   | 0.037838               |
| <b>Endotype 2 vs HC</b> |                     |                        |
| ACVR2B                  | +                   | 0.030244               |
| ADAM10                  | -                   | 0.028887               |
| ADGRF5                  | -                   | 0.01127                |
| ADH4                    | -                   | 0.02604                |
| ADI1                    | -                   | 0.0087                 |
| ADM                     | -                   | 0.0152                 |
| AGA                     | -                   | 0.032216               |
| AK1                     | +                   | 0.003884               |
| ANGPTL7                 | -                   | 0.012797               |
| ANTXR1                  | -                   | 0.044292               |
| APBB2                   | -                   | 0.039004               |
| ARHGAP30                | -                   | 0.018389               |
| ASCC1                   | -                   | 0.033628               |
| ATRAID                  | -                   | 0.046067               |
| BCAN                    | +                   | 0.026586               |
| BHMT2                   | -                   | 0.018454               |
| BMPR1A                  | +                   | 0.015205               |
| BMPR1B                  | +                   | 0.028188               |
| BRICD5                  | -                   | 0.026814               |
| BTC                     | +                   | 0.032831               |
| C1RL                    | -                   | 0.037815               |
| C4BPB                   | -                   | 0.039795               |
| CACYBP                  | -                   | 0.025286               |
| CALB1                   | -                   | 0.001629               |
| CBLN4                   | -                   | 0.033934               |
| CBS                     | -                   | 0.01127                |
| CCL14                   | +                   | 0.018389               |
| CCL26                   | +                   | 0.01127                |
| CD109                   | +                   | 0.010255               |
| CDC42BPA                | -                   | 0.031097               |
| CDH1                    | +                   | 0.01127                |
| CELA3B                  | -                   | 0.011114               |

|          |   |          |
|----------|---|----------|
| CES1     | - | 0.010315 |
| CHFR     | - | 0.036721 |
| CLPSL2   | + | 0.029088 |
| COL15A1  | + | 0.0087   |
| COMP     | - | 0.018454 |
| COX4I2   | + | 0.029088 |
| CPE      | + | 0.033934 |
| CRIM1    | + | 0.003884 |
| CRTAC1   | - | 0.012219 |
| CYCS     | - | 0.015748 |
| DAG1     | + | 0.012094 |
| DCTN2    | - | 0.015087 |
| DEFA5    | - | 0.04441  |
| DGKB     | - | 0.012094 |
| DLK2     | - | 0.033934 |
| DNER     | + | 0.026814 |
| DUSP6    | - | 0.02554  |
| EDA      | + | 0.049329 |
| EFNB3    | - | 0.02604  |
| EFS      | - | 0.030312 |
| EMID1    | + | 0.018323 |
| ENTPD5   | - | 0.033934 |
| EPHA3    | - | 0.031097 |
| EPHA4    | - | 0.015703 |
| EPHA5    | - | 0.0087   |
| EPHB6    | - | 0.046781 |
| FAF2     | + | 0.036273 |
| FAP      | - | 0.01127  |
| FCN3     | - | 0.003884 |
| FGF12    | - | 0.021536 |
| FGF7     | + | 0.049491 |
| FGL1     | - | 0.043482 |
| FRZB     | + | 0.010315 |
| GABBR1   | - | 0.008913 |
| GDF11    | - | 0.044292 |
| GFRA2    | - | 0.037815 |
| GP1BA    | - | 0.029614 |
| GPI      | + | 0.003884 |
| GRB2     | - | 0.026888 |
| GSTA1    | + | 0.013756 |
| HAMP     | + | 0.003335 |
| HAPLN1   | - | 0.006676 |
| HCAR2    | - | 0.01127  |
| HEPACAM2 | - | 0.044982 |
| HGF      | + | 0.02604  |
| HIKESHI  | + | 0.043174 |
| HLA-DMA  | - | 0.031097 |
| HPGD     | - | 0.030312 |
| HS6ST1   | + | 0.033367 |

|         |  |   |          |
|---------|--|---|----------|
| ICAM2   |  | - | 0.014061 |
| IGFBP2  |  | + | 0.01127  |
| IGFBPL1 |  | - | 0.017155 |
| IPLL1   |  | - | 0.028887 |
| IL17D   |  | + | 0.015703 |
| IL19    |  | - | 0.038722 |
| IL27RA  |  | - | 0.001827 |
| ITSN1   |  | - | 0.013756 |
| JAG1    |  | - | 0.003884 |
| KAT6A   |  | + | 0.015703 |
| KERA    |  | + | 0.010315 |
| LIPN    |  | - | 0.043482 |
| LPO     |  | - | 0.006758 |
| LRFN2   |  | - | 0.007147 |
| LRP12   |  | - | 0.013756 |
| LYVE1   |  | - | 0.043174 |
| MAN1B1  |  | - | 0.011928 |
| MAN1C1  |  | + | 0.013096 |
| MATN2   |  | + | 0.003204 |
| MDK     |  | + | 0.0087   |
| MEGF10  |  | - | 0.015087 |
| MFNG    |  | - | 0.045844 |
| MINOS1  |  | - | 0.049632 |
| MLEC    |  | + | 0.018323 |
| MMP8    |  | - | 0.02429  |
| MPZ     |  | + | 0.049329 |
| MST1R   |  | + | 0.006676 |
| NEFH    |  | + | 0.022218 |
| NELL2   |  | + | 0.024087 |
| NETO1   |  | - | 0.002132 |
| NPTN    |  | - | 0.015671 |
| NPTX2   |  | - | 0.01127  |
| NRXN1   |  | - | 0.01127  |
| NXPH3   |  | - | 0.015087 |
| OCIAD1  |  | - | 0.030312 |
| OCRL    |  | - | 0.01536  |
| OMD     |  | + | 0.011534 |
| OXT     |  | + | 0.01127  |
| PAPPA2  |  | + | 0.031097 |
| PGD     |  | + | 0.02604  |
| PKN1    |  | - | 0.028887 |
| PLA2G2C |  | + | 0.01127  |
| PLOD3   |  | + | 0.0087   |
| PLXNA1  |  | - | 0.0087   |
| PPA1    |  | - | 0.008913 |
| PRDM4   |  | - | 0.034647 |
| PRG2    |  | - | 0.018323 |
| PRRG4   |  | - | 0.037872 |
| PSMD5   |  | - | 0.024402 |



|            |   |          |
|------------|---|----------|
| PTPRR      | - | 0.003569 |
| PZP        | - | 0.032831 |
| RAB31      | - | 0.044713 |
| RAB6B      | - | 0.012094 |
| RAF1       | - | 0.010315 |
| RAPGEF5    | + | 0.046781 |
| RB1        | + | 0.012094 |
| RBL2       | - | 0.033261 |
| RBP4       | - | 0.029088 |
| RELT       | - | 0.033367 |
| RIPK2      | - | 0.001405 |
| RNASE4     | + | 0.013756 |
| ROBO3      | - | 0.008913 |
| ROR1       | - | 0.033628 |
| RSPO4      | - | 0.044481 |
| SCARA5     | - | 0.049882 |
| SCG2       | - | 0.011911 |
| SCUBE1     | + | 0.000451 |
| SERPINA10  | - | 0.015087 |
| SERPINA9   | - | 0.001394 |
| SFTA2      | - | 0.0087   |
| SHANK1     | - | 0.001827 |
| SHANK3     | - | 0.022448 |
| SMIM24     | - | 0.010315 |
| SMURF1     | - | 0.029088 |
| SOD3       | + | 0.021819 |
| SPINK9     | - | 0.013756 |
| SPOCK3     | + | 0.013096 |
| SPSB1      | + | 0.049664 |
| SRXN1      | - | 0.011339 |
| ST6GALNAC6 | + | 0.02604  |
| STMN3      | - | 0.015703 |
| STX10      | - | 0.001405 |
| STX12      | - | 0.010315 |
| STX1A      | - | 0.003884 |
| STX1B      | - | 0.039795 |
| STX2       | - | 0.029088 |
| STX3       | - | 0.032216 |
| STX7       | - | 0.013215 |
| SV2A       | - | 0.045639 |
| TCN2       | + | 0.033934 |
| TESC       | - | 0.03649  |
| TFPI       | + | 0.016421 |
| TFRC       | + | 0.015703 |
| TGFB3      | - | 0.039004 |
| THBS2      | + | 0.003884 |
| TMEM132B   | - | 0.044336 |
| TMEM132D   | - | 0.015671 |
| TMEM230    | - | 0.02604  |

|                                               |   |          |
|-----------------------------------------------|---|----------|
| TMEM8B                                        | - | 0.048641 |
| TNFRSF11B                                     | + | 0.012094 |
| TNFRSF13C                                     | - | 0.033934 |
| TNFRSF18                                      | - | 0.02604  |
| TNFRSF1A                                      | + | 0.028887 |
| TPO                                           | + | 0.028887 |
| TPSG1                                         | + | 0.02047  |
| TYMP                                          | - | 0.013756 |
| UBL4A                                         | - | 0.01127  |
| UNC5D                                         | - | 0.012094 |
| USE1                                          | - | 0.01127  |
| VEGFA                                         | - | 0.030088 |
| VIP                                           | - | 0.010315 |
| VWC2                                          | - | 0.02604  |
| VWC2L                                         | - | 0.002819 |
| WFDC13                                        | + | 0.048284 |
| YWHAG                                         | - | 0.011716 |
| YWHAZ, YWHAE, YWHAG, YWHAH, SFN, YWHAQ, YWHAB | - | 0.048641 |
| ZNF10                                         | + | 0.033934 |

### Endotype 1 vs Endotype 2

|          |   |          |
|----------|---|----------|
| ADAM10   | + | 0.014128 |
| ADAM23   | + | 0.010581 |
| ADAMTSL2 | + | 0.020978 |
| ADGRF5   | + | 0.049687 |
| ADM      | + | 0.047952 |
| AGA      | + | 0.032453 |
| AKT2     | - | 0.032343 |
| ANGPTL7  | + | 0.008783 |
| APBB2    | + | 0.04618  |
| ASIC4    | - | 0.027706 |
| ATP5B    | + | 0.046548 |
| AXIN2    | - | 0.049687 |
| B4GALT7  | - | 0.034828 |
| BAG4     | + | 0.023484 |
| BDNF     | + | 0.032453 |
| BMPR1B   | - | 0.013487 |
| BMPR2    | + | 0.027398 |
| BRD2     | - | 0.042062 |
| C1QBP    | + | 0.03846  |
| C4BPB    | + | 0.047952 |
| CA4      | + | 0.032343 |
| CA5A     | + | 0.030874 |
| CACYBP   | + | 0.040297 |
| CALB1    | + | 0.03049  |
| CAPN2    | + | 0.04618  |
| CASS4    | + | 0.030861 |

CCL26

- 0.02621  
5

|              |   |              |
|--------------|---|--------------|
| CD300E       | + | 0.04668<br>7 |
| CD47         | + | 0.00484<br>4 |
| CD96         | + | 0.01295<br>1 |
| CDC42BPA     | + | 0.03912      |
| CELA3B       | + | 0.01058<br>1 |
| CES1         | + | 0.00484<br>4 |
| CHFR         | + | 0.00493<br>4 |
| CHP1         | + | 0.03234<br>3 |
| CKS1B        | + | 0.03554<br>7 |
| CLCA1        | + | 0.04105<br>4 |
| CLEC2L       | + | 0.03086<br>1 |
| CNTFR        | + | 0.02310<br>8 |
| COX4I2       | - | 0.01760<br>6 |
| CRB1         | - | 0.04795<br>2 |
| CRIM1        | - | 0.01058<br>1 |
| CTSH         | + | 0.04123<br>6 |
| CUL4B        | + | 0.01595<br>2 |
| CXCL2, CXCL3 | + | 0.03245<br>3 |
| CYB5R3       | + | 0.01058<br>1 |
| CYP3A4       | + | 0.04795<br>2 |
| DCTN2        | + | 0.03234<br>3 |
| DGKB         | + | 0.02739<br>8 |
| DLL4         | + | 0.04094<br>8 |
| DNAJB12      | - | 0.03234<br>3 |
| DUSP26       | + | 0.03261<br>7 |
| DUSP6        | + | 0.02975<br>2 |
| EIF4G3       | + | 0.03912      |
| EMID1        | - | 0.02564      |

|         |   |              |
|---------|---|--------------|
| FAP     | + | 0.02097<br>8 |
| FBLN5   | - | 0.03245<br>3 |
| FCN3    | + | 0.03358<br>5 |
| FJX1    | - | 0.03739<br>6 |
| FLRT2   | - | 0.03340<br>9 |
| FSTL1   | - | 0.04668<br>7 |
| GABBR1  | + | 0.00878<br>3 |
| GALNT11 | - | 0.03245<br>3 |
| GP1BA   | + | 0.03364<br>1 |
| GPD1    | + | 0.02739<br>8 |
| GRB14   | + | 0.03234<br>3 |
| HCAR2   | + | 0.03941<br>1 |
| HLA-DMA | + | 0.02770<br>6 |
| HPGD    | + | 0.03912      |
| ICAM2   | + | 0.01048<br>8 |
| IFNG    | + | 0.03507<br>3 |
| IFNGR2  | + | 0.01760<br>6 |
| IGFBPL1 | + | 0.02739<br>8 |
| IGLL1   | + | 0.02961<br>1 |
| IL1B    | - | 0.00878<br>3 |
| IL22    | + | 0.03234<br>3 |
| IL27RA  | + | 0.01058<br>1 |
| ILF3    | + | 0.04818<br>6 |
| ITSN1   | + | 0.00405      |
| KAT6A   | - | 0.03234<br>3 |
| KEAP1   | + | 0.03245<br>3 |
| KIRREL3 | + | 0.04123<br>6 |
| KLRC4   | + | 0.03912      |
| LECT1   | + | 0.03912      |

|         |   |              |
|---------|---|--------------|
| LIPN    | + | 0.03245<br>3 |
| LRFN2   | + | 0.03739<br>6 |
| LTBP4   | - | 0.03554<br>7 |
| LYG1    | + | 0.04668<br>7 |
| MADCAM1 | + | 0.04646      |
| MAN1B1  | + | 0.03554<br>7 |
| MDK     | - | 0.04668<br>7 |
| MINOS1  | + | 0.01760<br>6 |
| MRM3    | + | 0.03060<br>3 |
| MST1R   | - | 0.02676<br>2 |
| MTMR1   | - | 0.02621<br>5 |
| MYRF    | - | 0.03393<br>4 |
| NAT14   | + | 0.04795<br>2 |
| NDUFV2  | + | 0.03049      |
| NEGR1   | + | 0.02348<br>4 |
| NPTN    | + | 0.00484<br>4 |
| NRXN1   | + | 0.03245<br>3 |
| NTM     | + | 0.02739<br>8 |
| NXPH3   | + | 0.02019<br>5 |
| PAPPA2  | - | 0.01760<br>6 |
| PELO    | + | 0.02961<br>1 |
| PLOD3   | - | 0.01649<br>9 |
| PPA1    | + | 0.00878<br>3 |
| PPBP    | + | 0.04795<br>2 |
| PRDM4   | + | 0.01566<br>3 |
| PRG2    | + | 0.03482<br>8 |
| PYDC1   | + | 0.04094<br>8 |
| PZP     | + | 0.04563<br>4 |

|            |   |              |
|------------|---|--------------|
| RB1        | - | 0.02951<br>2 |
| RBBP6      | + | 0.04795<br>2 |
| RBL2       | + | 0.04968<br>7 |
| RNF8       | + | 0.02621<br>5 |
| ROBO2      | + | 0.04818<br>6 |
| ROR2       | - | 0.02621<br>5 |
| RYK        | + | 0.03912      |
| SCARA5     | + | 0.04668<br>7 |
| SCARB2     | + | 0.03912      |
| SCG2       | + | 0.03245<br>3 |
| SCN2B      | + | 0.01649<br>9 |
| SCUBE1     | - | 0.01295<br>1 |
| SERPINA10  | + | 0.04795<br>2 |
| SERPINA9   | + | 0.01058<br>1 |
| SGF29      | + | 0.03551<br>1 |
| SLC14A2    | + | 0.01191<br>6 |
| SOD2       | + | 0.02766<br>6 |
| SPOCK3     | - | 0.03245<br>3 |
| ST6GALNAC6 | - | 0.03049      |
| STAB2      | - | 0.04668<br>7 |
| STMN3      | + | 0.03482<br>8 |
| STX10      | + | 0.00067<br>2 |
| STX12      | + | 0.01927<br>2 |
| STX1A      | + | 0.02348<br>4 |
| STX7       | + | 0.00585<br>2 |
| TESC       | + | 0.02586<br>3 |
| TFRC       | - | 0.02739<br>8 |
| THBS2      | - | 0.03245<br>3 |

|          |   |              |
|----------|---|--------------|
| THYN1    | + | 0.03245<br>3 |
| TMEM52B  | + | 0.04206<br>2 |
| TMEM8B   | + | 0.03245<br>3 |
| TNFRSF18 | + | 0.02739<br>8 |
| TP63     | + | 0.01649<br>9 |
| TPO      | - | 0.03912      |
| TPST1    | - | 0.02752<br>9 |
| TRAPPC5  | - | 0.01760<br>6 |
| TYMP     | + | 0.00772<br>6 |
| UBTD2    | + | 0.00772<br>6 |
| VTA1     | - | 0.03393<br>4 |
| XG       | + | 0.04094<br>8 |
| YWHAG    | + | 0.02739<br>8 |

The change in PD represents (+) increased and (-) decreased in the corresponding endotype vs controls, and endotype 1 vs endotype 2 respectively. **Note:** there are 198 proteins tagged by 200 SOMAmers for the contrast Endotype 2 vs HC and 153 proteins tagged by 155 SOMAmers for the contrast Endotype 1 vs 2. Duplicated SOMAmers are removed from the table for clarity (the one with the lowest p-value is kept). No discrepancies in directionality were present for duplicated SOMAmers. Proteins separated by comma in the same row represent the fact that due to lack of specificity the same SOMAmer is tagging more than one protein.

Supplementary Table 5

**Proteins with a significant cis-pQTL and their index SNPs**



|          | RSID        | CHROM | POS       | REF | ALT | $\beta$ | std.err | p-value                 |
|----------|-------------|-------|-----------|-----|-----|---------|---------|-------------------------|
| A4GALT   | rs9611914   | 22    | 43206587  | A   | T   | -0.24   | 0.04    | $5.92 \times 10^{-10}$  |
| ABO      | rs8176719   | 9     | 136132908 | T   | TC  | 1.18    | 0.03    | $2.93 \times 10^{-190}$ |
| ACBD7    | rs72774381  | 10    | 15127366  | A   | G   | -0.43   | 0.06    | $3.56 \times 10^{-12}$  |
| ACE      | rs4335      | 17    | 61565025  | G   | A   | -0.25   | 0.04    | $2.87 \times 10^{-10}$  |
| ACP1     | rs7595075   | 2     | 264019    | C   | A   | 1.15    | 0.03    | $8.70 \times 10^{-179}$ |
| ACP5     | rs78934187  | 19    | 11695690  | A   | G   | 0.60    | 0.04    | $5.81 \times 10^{-43}$  |
| ACP6     | rs2153463   | 1     | 147124310 | T   | G   | 1.08    | 0.03    | $4.95 \times 10^{-185}$ |
| ACP7     | rs1654245   | 19    | 39583160  | G   | A   | -0.59   | 0.06    | $8.36 \times 10^{-24}$  |
| ACYP2    | rs3930909   | 2     | 54204922  | C   | T   | -0.33   | 0.06    | $9.55 \times 10^{-9}$   |
| ADA2     | rs2231495   | 22    | 17669306  | T   | C   | -1.00   | 0.03    | $8.47 \times 10^{-129}$ |
| ADAM12   | rs10794080  | 10    | 128053754 | T   | C   | 0.37    | 0.04    | $3.61 \times 10^{-22}$  |
| ADAM9    | rs62504410  | 8     | 38822313  | T   | C   | 0.14    | 0.02    | $6.63 \times 10^{-9}$   |
| ADAMTS1  | rs56251528  | 21    | 28210854  | C   | T   | -0.61   | 0.09    | $7.28 \times 10^{-11}$  |
| ADAMTS13 | rs28647808  | 9     | 136305530 | C   | G   | -0.46   | 0.07    | $1.19 \times 10^{-10}$  |
| ADAMTS4  | rs4233367   | 1     | 161163037 | T   | C   | 0.66    | 0.04    | $1.76 \times 10^{-60}$  |
| ADAMTS5  | rs2830580   | 21    | 28291149  | C   | T   | -1.00   | 0.04    | $1.50 \times 10^{-104}$ |
| ADAMTSL1 | rs1832638   | 9     | 18494190  | T   | C   | 0.29    | 0.03    | $3.80 \times 10^{-18}$  |
| ADGRE2   | rs7256892   | 19    | 14878003  | C   | T   | -0.55   | 0.04    | $4.17 \times 10^{-33}$  |
| ADGRF5   | rs475991    | 6     | 46822349  | A   | G   | 0.24    | 0.04    | $1.20 \times 10^{-8}$   |
| ADH1B    | rs1229984   | 4     | 100239319 | T   | C   | 0.37    | 0.06    | $1.25 \times 10^{-9}$   |
| ADM      | rs10743132  | 11    | 10266998  | A   | G   | 0.20    | 0.03    | $2.10 \times 10^{-11}$  |
| AGRP     | rs4360931   | 16    | 67471926  | C   | G   | 0.65    | 0.07    | $4.44 \times 10^{-19}$  |
| AGT      | rs12028675  | 1     | 230832275 | A   | G   | -0.36   | 0.04    | $1.97 \times 10^{-23}$  |
| AHSG     | rs4917      | 3     | 186337713 | T   | C   | -1.27   | 0.03    | $2.87 \times 10^{-216}$ |
| AK1      | rs73602391  | 9     | 130661356 | G   | A   | -0.49   | 0.08    | $9.71 \times 10^{-10}$  |
| AKR1A1   | rs7520156   | 1     | 45912262  | A   | T   | -1.57   | 0.07    | $4.15 \times 10^{-83}$  |
| AKR1B1   | rs113764574 | 7     | 134207748 | G   | A   | -0.20   | 0.04    | $2.54 \times 10^{-8}$   |
| AKR1C1   | rs11594322  | 10    | 4956083   | A   | C   | -0.44   | 0.05    | $1.92 \times 10^{-16}$  |
| AKR7A2   | rs11800204  | 1     | 19576096  | T   | C   | -0.42   | 0.05    | $1.67 \times 10^{-18}$  |

|          |             |    |           |     |   |       |      |                         |
|----------|-------------|----|-----------|-----|---|-------|------|-------------------------|
| AMIGO2   | rs58366817  | 12 | 47934532  | T   | C | -0.27 | 0.04 | $3.32 \times 10^{-10}$  |
| AMY2B    | rs17014910  | 1  | 104104990 | C   | G | 0.28  | 0.04 | $2.12 \times 10^{-11}$  |
| ANG      | rs12433905  | 14 | 21158303  | G   | A | 0.62  | 0.06 | $1.17 \times 10^{-20}$  |
| ANGPTL1  | rs61823772  | 1  | 178925881 | C   | G | -0.33 | 0.04 | $2.22 \times 10^{-16}$  |
| ANGPTL4  | rs34099346  | 19 | 8503345   | G   | C | 0.33  | 0.06 | $3.02 \times 10^{-9}$   |
| ANGPTL7  | rs28729193  | 1  | 11180151  | T   | C | -0.20 | 0.04 | $1.59 \times 10^{-8}$   |
| ANXA2    | rs12900365  | 15 | 60644463  | T   | A | 0.20  | 0.03 | $2.62 \times 10^{-9}$   |
| ANXA5    | rs71606236  | 4  | 122580725 | T   | C | -0.33 | 0.04 | $3.16 \times 10^{-14}$  |
| AOC1     | rs62492368  | 7  | 150537635 | G   | A | 0.92  | 0.04 | $3.68 \times 10^{-94}$  |
| APCDD1   | rs3748415   | 18 | 10471732  | G   | A | -0.43 | 0.07 | $1.27 \times 10^{-10}$  |
| APOC2    | rs429358    | 19 | 45411941  | T   | C | 0.89  | 0.06 | $3.56 \times 10^{-39}$  |
| APOE     | rs429358    | 19 | 45411941  | T   | C | 0.82  | 0.05 | $2.49 \times 10^{-45}$  |
| APOH     | rs8178824   | 17 | 64224775  | C   | T | -1.63 | 0.08 | $1.13 \times 10^{-78}$  |
| APOL1    | rs10854688  | 22 | 36653854  | C   | T | 0.20  | 0.03 | $4.54 \times 10^{-9}$   |
| ARHGAP1  | rs79920646  | 11 | 46934260  | C   | G | -0.32 | 0.05 | $6.83 \times 10^{-11}$  |
| ARHGAP25 | rs10048745  | 2  | 68962137  | G   | A | -0.40 | 0.04 | $3.25 \times 10^{-23}$  |
| ARSA     | rs6151419   | 22 | 51064915  | G   | A | -0.51 | 0.05 | $2.01 \times 10^{-22}$  |
| ARSB     | rs13159135  | 5  | 78196689  | G   | C | -1.02 | 0.03 | $1.30 \times 10^{-127}$ |
| ARSK     | rs9314144   | 5  | 94797432  | T   | C | -0.60 | 0.08 | $2.55 \times 10^{-12}$  |
| ART3     | rs12509988  | 4  | 76989108  | A   | G | -0.65 | 0.05 | $9.32 \times 10^{-37}$  |
| ASAH2    | rs202183815 | 10 | 51994615  | C   | T | -0.79 | 0.04 | $6.27 \times 10^{-62}$  |
| ASIP     | rs62209647  | 20 | 32505658  | G   | C | 0.62  | 0.08 | $2.87 \times 10^{-13}$  |
| ASL      | rs77627477  | 7  | 66166078  | CTG | C | -0.34 | 0.04 | $6.31 \times 10^{-17}$  |
| ASPN     | rs10120980  | 9  | 95020914  | A   | G | -0.26 | 0.04 | $3.79 \times 10^{-11}$  |
| ATF6B    | rs805262    | 6  | 31628733  | C   | T | 0.17  | 0.03 | $4.17 \times 10^{-8}$   |
| ATP1B2   | rs1642764   | 17 | 7557834   | C   | T | -0.20 | 0.03 | $7.29 \times 10^{-10}$  |
| B3GAT3   | rs10897288  | 11 | 62386472  | A   | T | 0.37  | 0.03 | $3.67 \times 10^{-26}$  |
| B3GLCT   | rs11147458  | 13 | 31823239  | A   | G | -0.41 | 0.05 | $4.93 \times 10^{-16}$  |
| B3GNT8   | rs284663    | 19 | 41932612  | C   | T | 0.68  | 0.03 | $2.70 \times 10^{-70}$  |
| B4GALNT1 | rs34919374  | 12 | 58053464  | G   | A | 0.35  | 0.04 | $2.46 \times 10^{-14}$  |

|          |             |    |           |   |      |       |      |                         |
|----------|-------------|----|-----------|---|------|-------|------|-------------------------|
| B4GALT1  | rs4879664   | 9  | 33108246  | T | G    | -0.19 | 0.03 | $1.77 \times 10^{-9}$   |
| B4GALT2  | rs3216995   | 1  | 44443874  | T | TGAC | -0.56 | 0.06 | $3.06 \times 10^{-22}$  |
| B4GALT6  | rs16962266  | 18 | 29232293  | T | C    | -0.56 | 0.04 | $7.35 \times 10^{-33}$  |
| BCAM     | rs1135062   | 19 | 45322744  | A | G    | 0.26  | 0.03 | $1.02 \times 10^{-13}$  |
| BCAN     | rs2365715   | 1  | 156615114 | A | G    | -0.51 | 0.04 | $2.46 \times 10^{-38}$  |
| BCHE     | rs3908218   | 3  | 165462643 | A | G    | -0.27 | 0.04 | $9.99 \times 10^{-12}$  |
| BOC      | rs3856719   | 3  | 112996541 | T | C    | 0.40  | 0.05 | $4.30 \times 10^{-16}$  |
| BPI      | rs1341024   | 20 | 36932676  | G | C    | 0.20  | 0.03 | $3.92 \times 10^{-15}$  |
| BPIFB1   | rs11699009  | 20 | 31688241  | T | C    | -0.43 | 0.05 | $4.38 \times 10^{-20}$  |
| BRPF1    | rs2269112   | 3  | 9788168   | C | T    | 0.61  | 0.05 | $1.42 \times 10^{-27}$  |
| BST1     | rs4263397   | 4  | 15739390  | T | G    | -1.12 | 0.04 | $2.91 \times 10^{-141}$ |
| BTD      | rs6784108   | 3  | 15739777  | C | A    | -0.38 | 0.04 | $9.03 \times 10^{-20}$  |
| BTN2A1   | rs2237235   | 6  | 26391395  | A | G    | 0.50  | 0.03 | $7.10 \times 10^{-42}$  |
| BTN3A1   | rs9379851   | 6  | 26354780  | A | C    | -1.14 | 0.05 | $3.43 \times 10^{-84}$  |
| BTNL9    | rs34492237  | 5  | 180295971 | C | A    | 0.27  | 0.04 | $1.04 \times 10^{-9}$   |
| C1QC     | rs12058824  | 1  | 22963050  | G | A    | 0.67  | 0.08 | $3.52 \times 10^{-16}$  |
| C1QL1    | rs4793169   | 17 | 43152877  | T | C    | -0.30 | 0.03 | $3.13 \times 10^{-17}$  |
| C1QL4    | rs7972869   | 12 | 49731167  | A | G    | 0.36  | 0.06 | $3.88 \times 10^{-10}$  |
| C1QTNF3  | rs7712366   | 5  | 34038537  | A | G    | 0.56  | 0.04 | $4.57 \times 10^{-34}$  |
| C1QTNF5  | rs2248863   | 11 | 119207341 | G | A    | 0.52  | 0.07 | $3.17 \times 10^{-14}$  |
| C1S      | rs7962629   | 12 | 7166770   | A | G    | -0.37 | 0.06 | $6.63 \times 10^{-11}$  |
| C2       | rs116198852 | 6  | 31393014  | C | T    | -0.52 | 0.07 | $5.43 \times 10^{-13}$  |
| C4A      | rs2280774   | 6  | 31928691  | G | A    | -0.95 | 0.04 | $9.57 \times 10^{-105}$ |
| C4B      | rs2280774   | 6  | 31928691  | G | A    | -0.95 | 0.04 | $9.57 \times 10^{-105}$ |
| C7       | rs147512353 | 5  | 40971249  | T | C    | -0.32 | 0.05 | $2.40 \times 10^{-10}$  |
| CA4      | rs923038    | 17 | 58220132  | T | G    | -0.63 | 0.08 | $2.09 \times 10^{-15}$  |
| CA6      | rs3765963   | 1  | 9034598   | A | G    | 0.32  | 0.04 | $1.55 \times 10^{-13}$  |
| CA9      | rs2071676   | 9  | 35674053  | G | A    | 0.28  | 0.04 | $2.66 \times 10^{-10}$  |
| CABLES2  | rs2427312   | 20 | 60970591  | C | T    | -0.32 | 0.04 | $1.70 \times 10^{-15}$  |
| CALCOCO2 | rs550510    | 17 | 46926615  | G | A    | -0.30 | 0.04 | $3.91 \times 10^{-14}$  |

|        |             |    |           |   |   |       |      |                         |
|--------|-------------|----|-----------|---|---|-------|------|-------------------------|
| CAPG   | rs4446071   | 2  | 85543064  | T | C | -0.42 | 0.05 | $1.27 \times 10^{-18}$  |
| CAPSL  | rs6865274   | 5  | 35923829  | A | G | -0.39 | 0.07 | $1.28 \times 10^{-8}$   |
| CAT    | rs3781709   | 11 | 34504711  | T | C | -0.32 | 0.05 | $5.31 \times 10^{-10}$  |
| CBR1   | rs1005696   | 21 | 37443480  | T | G | -0.30 | 0.04 | $8.01 \times 10^{-12}$  |
| CBR3   | rs1056892   | 21 | 37518706  | G | A | -0.60 | 0.03 | $4.04 \times 10^{-60}$  |
| CCDC50 | rs56134151  | 3  | 191045679 | C | T | -0.20 | 0.04 | $9.99 \times 10^{-9}$   |
| CCL14  | rs7222922   | 17 | 34335694  | C | T | -0.92 | 0.05 | $1.58 \times 10^{-63}$  |
| CCL15  | rs41508645  | 17 | 34329044  | T | G | 1.13  | 0.06 | $7.86 \times 10^{-58}$  |
| CCL16  | rs112689088 | 17 | 34307457  | T | C | -1.30 | 0.05 | $5.62 \times 10^{-95}$  |
| CCL17  | rs223896    | 16 | 57443146  | G | A | -0.37 | 0.04 | $3.37 \times 10^{-16}$  |
| CCL18  | rs2015086   | 17 | 34391617  | A | G | 0.90  | 0.06 | $1.63 \times 10^{-47}$  |
| CCL23  | rs7208990   | 17 | 34329475  | C | G | -0.79 | 0.08 | $4.05 \times 10^{-23}$  |
| CCL25  | rs62124694  | 19 | 8126830   | A | C | 0.27  | 0.05 | $2.99 \times 10^{-8}$   |
| CCL3L1 | rs56683451  | 17 | 34374696  | T | C | 0.45  | 0.07 | $3.29 \times 10^{-11}$  |
| CCL7   | rs3138036   | 17 | 32647544  | A | G | -0.50 | 0.06 | $3.47 \times 10^{-14}$  |
| CCL8   | rs3138036   | 17 | 32647544  | A | G | -1.25 | 0.05 | $2.78 \times 10^{-106}$ |
| CCN3   | rs2469990   | 8  | 120344567 | A | G | -0.39 | 0.05 | $2.74 \times 10^{-14}$  |
| CCN4   | rs2739063   | 8  | 133948522 | A | G | -1.03 | 0.03 | $2.63 \times 10^{-132}$ |
| CCN5   | rs11086936  | 20 | 43331807  | C | G | 0.44  | 0.03 | $6.73 \times 10^{-33}$  |
| CD109  | rs10223501  | 6  | 74419424  | C | T | 0.41  | 0.04 | $5.84 \times 10^{-25}$  |
| CD14   | rs12517200  | 5  | 140019921 | A | G | 0.34  | 0.03 | $2.33 \times 10^{-21}$  |
| CD177  | rs78530667  | 19 | 43900697  | T | C | -0.74 | 0.07 | $2.59 \times 10^{-23}$  |
| CD209  | rs4804774   | 19 | 7772173   | G | C | -0.57 | 0.05 | $1.94 \times 10^{-29}$  |
| CD274  | rs7048841   | 9  | 5460801   | T | C | -0.53 | 0.03 | $2.48 \times 10^{-66}$  |
| CD300A | rs2272111   | 17 | 72469966  | G | A | -0.58 | 0.04 | $3.80 \times 10^{-49}$  |
| CD300C | rs2670826   | 17 | 72462466  | C | T | -0.28 | 0.04 | $4.05 \times 10^{-14}$  |
| CD300E | rs581157    | 17 | 72613589  | T | G | -0.67 | 0.04 | $5.52 \times 10^{-56}$  |
| CD33   | rs3865444   | 19 | 51727962  | C | A | -1.03 | 0.03 | $2.15 \times 10^{-154}$ |
| CD38   | rs6836946   | 4  | 15813607  | T | G | 0.31  | 0.05 | $5.73 \times 10^{-10}$  |
| CD48   | rs12124234  | 1  | 160675269 | G | C | 0.28  | 0.05 | $5.15 \times 10^{-9}$   |

|          |             |    |           |     |      |       |      |                         |
|----------|-------------|----|-----------|-----|------|-------|------|-------------------------|
| CD55     | rs116059019 | 1  | 207572442 | G   | A    | 0.56  | 0.05 | $6.98 \times 10^{-26}$  |
| CD59     | rs3181269   | 11 | 33755956  | C   | T    | -0.23 | 0.03 | $4.57 \times 10^{-15}$  |
| CD72     | rs7026779   | 9  | 35581458  | A   | G    | 0.71  | 0.04 | $1.14 \times 10^{-48}$  |
| CD83     | rs11756936  | 6  | 14110109  | G   | C    | 0.27  | 0.03 | $2.53 \times 10^{-15}$  |
| CD84     | rs796499427 | 1  | 160574660 | AAC | A    | -0.50 | 0.06 | $1.34 \times 10^{-15}$  |
| CD8A     | rs3020726   | 2  | 87016506  | A   | G    | 0.67  | 0.06 | $2.42 \times 10^{-26}$  |
| CD93     | rs11697283  | 20 | 23108635  | A   | G    | 0.25  | 0.04 | $1.50 \times 10^{-8}$   |
| CDCP1    | rs2276862   | 3  | 45187785  | C   | G    | -0.43 | 0.05 | $1.10 \times 10^{-16}$  |
| CDH11    | rs1124695   | 16 | 65037770  | C   | G    | -1.26 | 0.04 | $5.97 \times 10^{-154}$ |
| CDNF     | rs72772427  | 10 | 14911640  | C   | T    | 0.65  | 0.04 | $4.93 \times 10^{-57}$  |
| CDON     | rs35088114  | 11 | 125842801 | G   | GGCA | -0.53 | 0.06 | $1.63 \times 10^{-18}$  |
| CEACAM19 | rs429358    | 19 | 45411941  | T   | C    | 0.46  | 0.05 | $4.05 \times 10^{-17}$  |
| CEL      | rs668809    | 9  | 135936678 | A   | G    | 1.28  | 0.10 | $8.17 \times 10^{-37}$  |
| CER1     | rs2131882   | 9  | 14716849  | T   | A    | 0.89  | 0.06 | $6.77 \times 10^{-44}$  |
| CFB      | rs9296004   | 6  | 31933977  | A   | C    | -0.47 | 0.07 | $2.41 \times 10^{-10}$  |
| CFD      | rs71335276  | 19 | 859368    | G   | T    | 0.93  | 0.05 | $5.16 \times 10^{-74}$  |
| CFH      | rs35617250  | 1  | 196679682 | C   | T    | 0.40  | 0.05 | $1.35 \times 10^{-13}$  |
| CFHR1    | rs71631867  | 1  | 196814850 | T   | A    | -0.86 | 0.04 | $1.01 \times 10^{-81}$  |
| CFHR4    | rs200880049 | 1  | 196790437 | T   | A    | -0.17 | 0.03 | $2.38 \times 10^{-11}$  |
| CFHR5    | rs1694459   | 1  | 196815786 | C   | T    | 0.33  | 0.04 | $1.04 \times 10^{-13}$  |
| CFI      | rs7439493   | 4  | 110656730 | G   | A    | 0.21  | 0.04 | $2.68 \times 10^{-8}$   |
| CGB3     | rs78248023  | 19 | 49515171  | C   | A    | 0.97  | 0.06 | $2.72 \times 10^{-50}$  |
| CGB7     | rs78248023  | 19 | 49515171  | C   | A    | 0.97  | 0.06 | $2.72 \times 10^{-50}$  |
| CHGA     | rs729940    | 14 | 93399101  | C   | T    | -0.27 | 0.04 | $4.92 \times 10^{-12}$  |
| CHI3L1   | rs946259    | 1  | 203152177 | C   | T    | -1.07 | 0.03 | $2.09 \times 10^{-183}$ |
| CHI3L2   | rs11556868  | 1  | 111778325 | C   | T    | 1.42  | 0.05 | $8.36 \times 10^{-127}$ |
| CHIT1    | rs2486063   | 1  | 203173094 | A   | G    | -1.04 | 0.05 | $7.77 \times 10^{-82}$  |
| CHRD     | rs73053799  | 3  | 184111595 | C   | T    | 0.36  | 0.05 | $8.46 \times 10^{-13}$  |
| CHRD_L2  | rs7104802   | 11 | 74386800  | G   | T    | 0.35  | 0.03 | $7.22 \times 10^{-27}$  |
| CHST12   | rs3735099   | 7  | 2472429   | C   | A    | 0.73  | 0.06 | $5.51 \times 10^{-32}$  |

|         |             |    |           |    |     |       |      |                         |
|---------|-------------|----|-----------|----|-----|-------|------|-------------------------|
| CHST9   | rs12968277  | 18 | 24637729  | G  | C   | 0.91  | 0.03 | $4.71 \times 10^{-119}$ |
| CLEC11A | rs11666008  | 19 | 51226590  | C  | G   | -0.35 | 0.05 | $2.93 \times 10^{-11}$  |
| CLEC12A | rs607567    | 12 | 10131684  | T  | G   | -1.12 | 0.03 | $3.05 \times 10^{-179}$ |
| CLEC2L  | rs12672312  | 7  | 139230464 | C  | T   | 0.16  | 0.02 | $5.49 \times 10^{-11}$  |
| CLEC3B  | rs4683019   | 3  | 45040682  | T  | C   | -0.33 | 0.03 | $4.61 \times 10^{-23}$  |
| CLEC4C  | rs10845821  | 12 | 7900184   | C  | T   | 0.56  | 0.04 | $4.37 \times 10^{-35}$  |
| CLEC4G  | rs115293707 | 19 | 7794609   | G  | C   | 1.39  | 0.07 | $1.07 \times 10^{-73}$  |
| CLEC7A  | rs16910526  | 12 | 10271087  | A  | C   | -1.48 | 0.07 | $2.48 \times 10^{-82}$  |
| CLIC5   | rs76820035  | 6  | 45919515  | G  | A   | 0.78  | 0.08 | $8.69 \times 10^{-21}$  |
| CLN5    | rs2794618   | 13 | 77584224  | G  | A   | -0.71 | 0.07 | $1.32 \times 10^{-21}$  |
| CLPS    | rs12193764  | 6  | 35742556  | C  | G   | 0.48  | 0.05 | $3.24 \times 10^{-21}$  |
| CNDP1   | rs4329999   | 18 | 72228269  | G  | A   | -0.48 | 0.04 | $1.20 \times 10^{-28}$  |
| CNTN2   | rs41264869  | 1  | 205030862 | C  | T   | -0.68 | 0.05 | $3.66 \times 10^{-32}$  |
| CNTN4   | rs163352    | 3  | 3098041   | G  | C   | -0.18 | 0.02 | $8.68 \times 10^{-13}$  |
| CNTN5   | rs72998295  | 11 | 99093036  | T  | C   | -0.25 | 0.04 | $4.89 \times 10^{-9}$   |
| COCH    | rs66816140  | 14 | 31239287  | AC | A   | 0.67  | 0.04 | $2.71 \times 10^{-47}$  |
| COL11A2 | rs17847933  | 6  | 33165780  | G  | C   | 0.74  | 0.08 | $3.51 \times 10^{-20}$  |
| COL15A1 | rs7025094   | 9  | 101667626 | G  | A   | 0.31  | 0.04 | $1.26 \times 10^{-12}$  |
| COL18A1 | rs12483377  | 21 | 46931109  | G  | A   | -0.42 | 0.06 | $1.01 \times 10^{-10}$  |
| COL23A1 | rs4976753   | 5  | 177681651 | C  | T   | -0.81 | 0.09 | $1.36 \times 10^{-17}$  |
| COLEC11 | rs11123637  | 2  | 3654190   | T  | C   | -1.06 | 0.03 | $3.63 \times 10^{-140}$ |
| CPA4    | rs34587586  | 7  | 129938598 | G  | T   | -1.14 | 0.03 | $2.48 \times 10^{-176}$ |
| CPB1    | rs13079446  | 3  | 148509614 | T  | A   | -0.84 | 0.06 | $6.26 \times 10^{-38}$  |
| CPB2    | rs9567615   | 13 | 46651080  | A  | C   | 0.30  | 0.04 | $2.91 \times 10^{-12}$  |
| CPE     | rs72703629  | 4  | 166346061 | T  | C   | 0.27  | 0.03 | $2.73 \times 10^{-15}$  |
| CPM     | rs12372220  | 12 | 69371471  | C  | T   | -0.77 | 0.05 | $1.21 \times 10^{-55}$  |
| CPN2    | rs6809081   | 3  | 194060475 | T  | C   | -0.34 | 0.04 | $8.78 \times 10^{-15}$  |
| CPXM1   | rs11697820  | 20 | 2781441   | C  | T   | 0.91  | 0.04 | $4.39 \times 10^{-101}$ |
| CPZ     | rs13121547  | 4  | 8601592   | G  | T   | -0.51 | 0.04 | $1.27 \times 10^{-29}$  |
| CREB3L4 | rs140257179 | 1  | 153963995 | A  | AAG | 0.38  | 0.04 | $2.57 \times 10^{-19}$  |

|                |             |    |           |                                       |   |       |      |                         |
|----------------|-------------|----|-----------|---------------------------------------|---|-------|------|-------------------------|
| CRELD1         | rs6762702   | 3  | 10055789  | G                                     | A | -0.62 | 0.04 | $6.18 \times 10^{-58}$  |
| CRHBP          | rs6871700   | 5  | 76209399  | A                                     | G | -0.28 | 0.04 | $3.10 \times 10^{-10}$  |
| CRIM1          | rs10189344  | 2  | 36778887  | A                                     | C | -0.22 | 0.03 | $9.03 \times 10^{-12}$  |
| CRISP2         | rs10948527  | 6  | 49746832  | C                                     | T | -0.44 | 0.05 | $1.07 \times 10^{-18}$  |
| CRISPLD2       | rs1466716   | 16 | 84870034  | T                                     | C | 0.51  | 0.06 | $8.58 \times 10^{-16}$  |
| CRLF1          | rs3761031   | 19 | 18721451  | G                                     | A | 0.39  | 0.04 | $2.07 \times 10^{-22}$  |
| CROT           | rs7776867   | 7  | 87014355  | C                                     | T | -0.55 | 0.08 | $1.09 \times 10^{-11}$  |
| CRTAC1         | rs10883027  | 10 | 99798234  | G                                     | C | 0.16  | 0.02 | $3.21 \times 10^{-14}$  |
| CRYGD          | rs55770589  | 2  | 208985427 | T                                     | C | 0.32  | 0.03 | $2.15 \times 10^{-24}$  |
| CRYZ           | rs3819946   | 1  | 75175886  | T                                     | C | 1.02  | 0.04 | $2.91 \times 10^{-101}$ |
| CSGALNAC<br>T2 | rs2435381   | 10 | 43678796  | C                                     | T | -0.98 | 0.04 | $6.93 \times 10^{-118}$ |
| CST1           | rs113896553 | 20 | 23731589  | G                                     | C | 1.10  | 0.03 | $1.24 \times 10^{-143}$ |
| CST2           | rs113896553 | 20 | 23731589  | G                                     | C | 1.09  | 0.03 | $1.92 \times 10^{-148}$ |
| CST3           | rs2983644   | 20 | 23592966  | C                                     | A | 0.38  | 0.03 | $3.93 \times 10^{-30}$  |
| CST4           | rs7264810   | 20 | 23673625  | C                                     | A | -0.54 | 0.07 | $1.19 \times 10^{-13}$  |
| CST5           | rs4239743   | 20 | 23859017  | A                                     | C | 0.69  | 0.04 | $3.04 \times 10^{-59}$  |
| CST6           | rs1131544   | 11 | 65779590  | C                                     | T | 1.18  | 0.04 | $1.02 \times 10^{-126}$ |
| CST7           | rs148851012 | 20 | 24973964  | ATTT<br>GATA<br>AAGT<br>TTATT<br>AAGT | A | 0.85  | 0.07 | $2.74 \times 10^{-32}$  |
| CTHRC1         | rs10093100  | 8  | 104368191 | T                                     | C | 0.41  | 0.04 | $3.27 \times 10^{-19}$  |
| CTNNA2         | rs72917277  | 2  | 79549662  | A                                     | G | -0.41 | 0.06 | $1.26 \times 10^{-10}$  |
| CTRB1          | rs113366803 | 16 | 75299391  | A                                     | G | 0.45  | 0.08 | $3.42 \times 10^{-8}$   |
| CTRB2          | rs889515    | 16 | 75251299  | T                                     | C | -1.00 | 0.05 | $1.35 \times 10^{-65}$  |
| CTSB           | rs28577034  | 8  | 11708715  | A                                     | T | -0.68 | 0.04 | $1.76 \times 10^{-50}$  |
| CTSC           | rs11600158  | 11 | 88070914  | A                                     | G | 0.89  | 0.07 | $3.39 \times 10^{-37}$  |
| CTSF           | rs1127894   | 11 | 66335548  | A                                     | G | 0.26  | 0.04 | $7.79 \times 10^{-12}$  |
| CTSH           | rs2289702   | 15 | 79237293  | C                                     | T | -1.49 | 0.06 | $9.07 \times 10^{-90}$  |
| CTSK           | rs55890313  | 1  | 150640078 | T                                     | A | -0.47 | 0.07 | $5.00 \times 10^{-12}$  |
| CTSO           | rs138798877 | 4  | 156936516 | ATATT                                 | A | -0.46 | 0.08 | $3.91 \times 10^{-8}$   |

|         |             |    |           |           |   |       |      |                         |
|---------|-------------|----|-----------|-----------|---|-------|------|-------------------------|
| CTSS    | rs41271951  | 1  | 150737220 | A         | G | -1.26 | 0.09 | $1.04 \times 10^{-41}$  |
| CTSZ    | rs163787    | 20 | 57574463  | A         | G | 0.40  | 0.05 | $3.58 \times 10^{-14}$  |
| CXCL1   | rs7438101   | 4  | 74728327  | T         | C | -0.33 | 0.05 | $9.90 \times 10^{-10}$  |
| CXCL6   | rs62312418  | 4  | 74701512  | G         | A | 0.35  | 0.04 | $5.70 \times 10^{-16}$  |
| CYB5D2  | rs35103069  | 17 | 4108063   | G         | C | -0.21 | 0.03 | $2.44 \times 10^{-9}$   |
| CYTL1   | rs6446312   | 4  | 5019932   | C         | G | -0.69 | 0.05 | $9.77 \times 10^{-39}$  |
| DEFB1   | rs2978857   | 8  | 6741305   | T         | G | -1.18 | 0.03 | $3.47 \times 10^{-157}$ |
| DKK2    | rs17037069  | 4  | 107838076 | A         | G | -0.62 | 0.07 | $4.69 \times 10^{-16}$  |
| DLK1    | rs1058009   | 14 | 101200860 | G         | A | -0.62 | 0.09 | $8.54 \times 10^{-12}$  |
| DLL1    | rs9459968   | 6  | 170497591 | C         | T | -0.32 | 0.04 | $5.38 \times 10^{-18}$  |
| DNAJC10 | rs746705411 | 2  | 183612210 | CTT       | C | 0.18  | 0.03 | $2.00 \times 10^{-9}$   |
| DNAJC30 | rs10479665  | 7  | 73108924  | A         | G | -0.88 | 0.10 | $4.14 \times 10^{-18}$  |
| DNER    | rs67033065  | 2  | 230532197 | ATCC<br>T | A | -0.19 | 0.02 | $3.40 \times 10^{-17}$  |
| DPP7    | rs6560658   | 9  | 140004229 | C         | G | 0.82  | 0.05 | $4.12 \times 10^{-57}$  |
| DPT     | rs12048750  | 1  | 168922582 | G         | A | 0.44  | 0.04 | $6.08 \times 10^{-22}$  |
| DRAXIN  | rs1555079   | 1  | 11760782  | C         | T | -0.71 | 0.04 | $6.37 \times 10^{-72}$  |
| DSC2    | rs1789064   | 18 | 28674402  | A         | T | -0.49 | 0.04 | $8.70 \times 10^{-35}$  |
| DSC3    | rs1370450   | 18 | 28741821  | G         | A | -0.23 | 0.04 | $7.35 \times 10^{-9}$   |
| DSCAM   | rs401936    | 21 | 41449867  | C         | T | 0.27  | 0.02 | $1.71 \times 10^{-26}$  |
| DSG2    | rs9304098   | 18 | 29083630  | G         | T | -0.45 | 0.04 | $6.00 \times 10^{-24}$  |
| EBI3    | rs4740      | 19 | 4236996   | G         | A | -1.18 | 0.03 | $1.95 \times 10^{-179}$ |
| ECH1    | rs2229259   | 19 | 39307103  | C         | T | 0.58  | 0.06 | $2.98 \times 10^{-18}$  |
| ECM1    | rs9326002   | 1  | 150495106 | A         | G | -0.42 | 0.03 | $2.03 \times 10^{-51}$  |
| EDAR    | rs260689    | 2  | 109579110 | G         | A | 0.36  | 0.06 | $2.60 \times 10^{-8}$   |
| EDIL3   | rs13160212  | 5  | 83219474  | T         | C | 0.42  | 0.05 | $2.60 \times 10^{-19}$  |
| EFEMP1  | rs1430192   | 2  | 56117040  | T         | C | 0.39  | 0.03 | $1.14 \times 10^{-32}$  |
| EFNA5   | rs7709385   | 5  | 107047072 | G         | T | -0.18 | 0.03 | $1.23 \times 10^{-8}$   |
| EGF     | rs4698801   | 4  | 110882476 | C         | A | 0.38  | 0.04 | $6.48 \times 10^{-24}$  |
| EGFLAM  | rs12516477  | 5  | 38245951  | T         | C | 0.84  | 0.08 | $1.81 \times 10^{-26}$  |



|         |             |    |           |    |    |       |      |                         |
|---------|-------------|----|-----------|----|----|-------|------|-------------------------|
| EGFR    | rs151057105 | 7  | 54944920  | C  | T  | -0.66 | 0.04 | $4.80 \times 10^{-43}$  |
| EHF     | rs286924    | 11 | 34642728  | A  | T  | -0.59 | 0.09 | $1.81 \times 10^{-10}$  |
| EMILIN3 | rs6102384   | 20 | 39997745  | T  | C  | 0.41  | 0.07 | $1.05 \times 10^{-8}$   |
| ENDOU   | rs7976708   | 12 | 48116255  | A  | G  | -0.58 | 0.05 | $1.03 \times 10^{-26}$  |
| ENPP5   | rs62400861  | 6  | 46100229  | C  | G  | -1.52 | 0.04 | $3.85 \times 10^{-173}$ |
| ENPP7   | rs36069406  | 17 | 77696496  | GC | G  | 0.80  | 0.04 | $4.56 \times 10^{-78}$  |
| ENTPD3  | rs2276868   | 3  | 40498845  | C  | T  | 0.31  | 0.04 | $2.08 \times 10^{-13}$  |
| ENTPD6  | rs3859660   | 20 | 25915180  | A  | T  | 0.68  | 0.07 | $1.47 \times 10^{-20}$  |
| EPDR1   | rs2044831   | 7  | 37988589  | C  | T  | -0.35 | 0.05 | $7.07 \times 10^{-13}$  |
| EPHA1   | rs4725617   | 7  | 143097100 | A  | G  | 1.44  | 0.08 | $4.17 \times 10^{-66}$  |
| EPHA10  | rs12049522  | 1  | 38245517  | T  | G  | -0.14 | 0.02 | $1.40 \times 10^{-8}$   |
| EPHA2   | rs28452540  | 1  | 16423834  | A  | G  | -0.23 | 0.04 | $2.11 \times 10^{-9}$   |
| EPHA5   | rs10434242  | 4  | 66518523  | A  | G  | 0.14  | 0.02 | $1.65 \times 10^{-9}$   |
| EPO     | rs114129687 | 7  | 100290926 | T  | G  | -0.39 | 0.04 | $2.79 \times 10^{-20}$  |
| ERAP1   | rs26653     | 5  | 96139250  | C  | G  | -0.95 | 0.03 | $7.78 \times 10^{-117}$ |
| ERAP2   | rs2927608   | 5  | 96252432  | G  | A  | 1.23  | 0.03 | $1.53 \times 10^{-225}$ |
| ERBB4   | rs12987104  | 2  | 213302799 | A  | G  | -0.27 | 0.04 | $6.13 \times 10^{-11}$  |
| ERLEC1  | rs17039525  | 2  | 53955513  | A  | C  | -0.14 | 0.02 | $1.04 \times 10^{-9}$   |
| ERLIN1  | rs2862954   | 10 | 101912064 | T  | C  | 0.36  | 0.04 | $4.48 \times 10^{-15}$  |
| ERO1B   | rs2477599   | 1  | 236413230 | T  | A  | -1.01 | 0.03 | $4.86 \times 10^{-145}$ |
| ESD     | rs1216970   | 13 | 47374012  | C  | G  | -1.29 | 0.06 | $7.03 \times 10^{-76}$  |
| ESM1    | rs78414307  | 5  | 54434781  | TA | T  | -0.38 | 0.05 | $5.97 \times 10^{-12}$  |
| EYS     | rs9342464   | 6  | 66005888  | C  | T  | 0.22  | 0.04 | $4.08 \times 10^{-8}$   |
| F11     | rs6824705   | 4  | 187213889 | C  | T  | 0.30  | 0.04 | $4.64 \times 10^{-14}$  |
| F13B    | rs35258876  | 1  | 197151626 | C  | CA | -0.25 | 0.04 | $6.33 \times 10^{-11}$  |
| F5      | rs72708013  | 1  | 169481731 | T  | G  | -0.87 | 0.09 | $1.13 \times 10^{-20}$  |
| FABP1   | rs2241883   | 2  | 88424066  | T  | C  | -0.24 | 0.04 | $1.05 \times 10^{-10}$  |
| FABP3   | rs879491795 | 1  | 31676195  | AG | A  | 0.24  | 0.04 | $5.61 \times 10^{-9}$   |
| FABP6   | rs10063628  | 5  | 159631958 | C  | G  | -0.61 | 0.05 | $8.47 \times 10^{-35}$  |
| FAH     | rs34239630  | 15 | 80441888  | C  | T  | -0.35 | 0.05 | $1.47 \times 10^{-11}$  |

|          |             |    |           |                    |       |       |      |                         |
|----------|-------------|----|-----------|--------------------|-------|-------|------|-------------------------|
| FAIM     | rs641320    | 3  | 138347957 | G                  | A     | 1.47  | 0.08 | $2.43 \times 10^{-69}$  |
| FAM177A1 | rs79698726  | 14 | 35522350  | A                  | C     | -0.22 | 0.03 | $6.18 \times 10^{-12}$  |
| FAM20A   | rs12602247  | 17 | 66685034  | C                  | G     | 0.30  | 0.04 | $6.23 \times 10^{-11}$  |
| FAM234B  | rs200946929 | 12 | 13201461  | TCTG<br>TTAT<br>CC | T     | 0.18  | 0.03 | $1.74 \times 10^{-8}$   |
| FAM3B    | rs66817580  | 21 | 42689637  | G                  | T     | 1.42  | 0.04 | $1.50 \times 10^{-147}$ |
| FAM3D    | rs3749290   | 3  | 58652292  | G                  | T     | -0.67 | 0.06 | $4.38 \times 10^{-28}$  |
| FAS      | rs6586163   | 10 | 90752018  | A                  | C     | 0.90  | 0.03 | $6.05 \times 10^{-121}$ |
| FBP1     | rs28369691  | 9  | 97384265  | C                  | T     | 0.68  | 0.08 | $8.56 \times 10^{-17}$  |
| FBP2     | rs10761342  | 9  | 97346079  | C                  | T     | 0.28  | 0.05 | $2.90 \times 10^{-9}$   |
| FCER1A   | rs6703348   | 1  | 159291683 | C                  | G     | 0.61  | 0.04 | $1.44 \times 10^{-38}$  |
| FCER2    | rs12980031  | 19 | 7764436   | G                  | T     | -1.08 | 0.03 | $2.97 \times 10^{-141}$ |
| FCGR2A   | rs1801274   | 1  | 161479745 | A                  | G     | 1.23  | 0.02 | $5.70 \times 10^{-262}$ |
| FCGR2B   | rs1801274   | 1  | 161479745 | A                  | G     | 1.05  | 0.03 | $2.26 \times 10^{-137}$ |
| FCGR3B   | rs2487452   | 1  | 161530869 | G                  | A     | 0.47  | 0.05 | $1.38 \times 10^{-21}$  |
| FCN2     | rs7037264   | 9  | 137775212 | G                  | A     | -0.65 | 0.04 | $1.97 \times 10^{-53}$  |
| FCRL6    | rs12088352  | 1  | 159784539 | G                  | A     | -0.37 | 0.04 | $2.95 \times 10^{-17}$  |
| FGF17    | rs77473749  | 8  | 21877382  | C                  | G     | 1.19  | 0.08 | $3.37 \times 10^{-46}$  |
| FGF19    | rs9667380   | 11 | 69611959  | C                  | T     | 0.33  | 0.04 | $2.83 \times 10^{-17}$  |
| FGFBP3   | rs10881987  | 10 | 93641869  | A                  | G     | 0.40  | 0.04 | $1.61 \times 10^{-21}$  |
| FGFRL1   | rs4647930   | 4  | 1018705   | C                  | A     | 0.35  | 0.04 | $1.44 \times 10^{-17}$  |
| FKBP14   | rs28619411  | 7  | 30096002  | A                  | T     | 0.37  | 0.03 | $3.18 \times 10^{-39}$  |
| FKBP7    | rs2886712   | 2  | 179311529 | G                  | A     | 0.64  | 0.03 | $5.55 \times 10^{-72}$  |
| FLRT1    | rs588177    | 11 | 64024056  | C                  | A     | 0.18  | 0.03 | $2.92 \times 10^{-8}$   |
| FLRT2    | rs10498583  | 14 | 85742934  | G                  | A     | -0.17 | 0.03 | $1.85 \times 10^{-8}$   |
| FLRT3    | rs150296190 | 20 | 14822666  | T                  | TTTTG | -0.21 | 0.03 | $1.38 \times 10^{-14}$  |
| FMOD     | rs28583560  | 1  | 203315331 | G                  | A     | -0.71 | 0.09 | $8.67 \times 10^{-15}$  |
| FOLH1    | rs56287037  | 11 | 49106344  | G                  | A     | 1.49  | 0.10 | $1.33 \times 10^{-44}$  |
| FREM2    | rs34692381  | 13 | 39331723  | C                  | T     | -0.63 | 0.04 | $1.64 \times 10^{-55}$  |
| FRZB     | rs288326    | 2  | 183703336 | G                  | A     | 0.79  | 0.06 | $5.16 \times 10^{-40}$  |

|         |             |    |           |                                             |   |       |      |                         |
|---------|-------------|----|-----------|---------------------------------------------|---|-------|------|-------------------------|
| FSTL1   | rs66685284  | 3  | 120172964 | AAC                                         | A | 0.30  | 0.05 | $3.58 \times 10^{-11}$  |
| FSTL3   | rs71333301  | 19 | 676904    | CGA                                         | C | -0.24 | 0.04 | $2.87 \times 10^{-11}$  |
| FSTL5   | rs2314103   | 4  | 162334838 | T                                           | C | -0.58 | 0.06 | $9.24 \times 10^{-20}$  |
| FUT10   | rs16880849  | 8  | 33246538  | A                                           | G | 0.53  | 0.03 | $2.24 \times 10^{-54}$  |
| FUT5    | rs72989070  | 19 | 5895358   | C                                           | T | 0.91  | 0.03 | $5.33 \times 10^{-115}$ |
| FUT8    | rs7140341   | 14 | 66070417  | C                                           | G | 0.29  | 0.04 | $4.46 \times 10^{-13}$  |
| GALNT10 | rs1106324   | 5  | 153580836 | A                                           | G | 0.24  | 0.04 | $1.10 \times 10^{-8}$   |
| GALNT16 | rs7143324   | 14 | 69755470  | A                                           | G | -0.32 | 0.03 | $7.71 \times 10^{-19}$  |
| GCA     | rs17783344  | 2  | 163208893 | T                                           | G | -0.40 | 0.05 | $7.10 \times 10^{-18}$  |
| GDF10   | rs11593867  | 10 | 48443093  | G                                           | A | -0.24 | 0.04 | $9.47 \times 10^{-9}$   |
| GDF15   | rs199580670 | 19 | 18475747  | TGGC<br>GCGG<br>GGGG<br>CTCA<br>AAAC<br>GGG | T | 0.47  | 0.04 | $1.55 \times 10^{-28}$  |
| GFRA1   | rs11197613  | 10 | 118026217 | G                                           | T | -0.38 | 0.06 | $2.37 \times 10^{-9}$   |
| GFRAL   | rs6929594   | 6  | 55218980  | G                                           | A | 0.61  | 0.04 | $1.91 \times 10^{-50}$  |
| GGH     | rs34223853  | 8  | 63953538  | CA                                          | C | 0.46  | 0.04 | $4.12 \times 10^{-28}$  |
| GKN2    | rs13008230  | 2  | 69154583  | T                                           | G | -0.56 | 0.10 | $4.82 \times 10^{-8}$   |
| GLCE    | rs3865014   | 15 | 69561518  | G                                           | A | 1.13  | 0.04 | $6.42 \times 10^{-133}$ |
| GLIPR1  | rs2242435   | 12 | 75874913  | G                                           | A | -0.22 | 0.04 | $3.99 \times 10^{-8}$   |
| GLO1    | rs34637217  | 6  | 38657463  | C                                           | T | -0.23 | 0.04 | $1.25 \times 10^{-8}$   |
| GLRX2   | rs74540121  | 1  | 193177917 | T                                           | A | 0.25  | 0.04 | $2.51 \times 10^{-12}$  |
| GNLY    | rs370615710 | 2  | 85932002  | GT                                          | G | 0.88  | 0.05 | $6.04 \times 10^{-52}$  |
| GNRH1   | rs13261573  | 8  | 25248615  | G                                           | A | -0.31 | 0.05 | $1.49 \times 10^{-8}$   |
| GNRH2   | rs8184100   | 20 | 3026415   | C                                           | T | -1.22 | 0.05 | $3.95 \times 10^{-99}$  |
| GOLM1   | rs148272757 | 9  | 88714593  | C                                           | A | 0.45  | 0.05 | $5.14 \times 10^{-17}$  |
| GP6     | rs1613662   | 19 | 55536595  | G                                           | A | 0.44  | 0.05 | $4.44 \times 10^{-19}$  |
| GPC1    | rs60515008  | 2  | 241408434 | T                                           | C | 0.75  | 0.06 | $2.20 \times 10^{-30}$  |
| GPC5    | rs9523326   | 13 | 92052108  | G                                           | A | -0.30 | 0.03 | $2.47 \times 10^{-24}$  |
| GPC6    | rs1535692   | 13 | 95034749  | G                                           | A | -0.45 | 0.05 | $1.26 \times 10^{-17}$  |
| GPNMB   | rs858275    | 7  | 23294144  | T                                           | C | -0.80 | 0.03 | $5.35 \times 10^{-95}$  |

|          |            |    |           |   |    |       |      |                         |
|----------|------------|----|-----------|---|----|-------|------|-------------------------|
| GRN      | rs5848     | 17 | 42430244  | C | T  | -0.33 | 0.04 | $7.79 \times 10^{-15}$  |
| GRP      | rs8091691  | 18 | 56827121  | G | A  | -0.32 | 0.05 | $6.10 \times 10^{-12}$  |
| GSN      | rs76098787 | 9  | 124047836 | T | C  | 0.92  | 0.07 | $3.36 \times 10^{-33}$  |
| GSTM1    | rs599363   | 1  | 110218486 | G | T  | -0.86 | 0.07 | $2.42 \times 10^{-32}$  |
| GSTM3    | rs12137743 | 1  | 110253555 | C | T  | -0.65 | 0.04 | $4.67 \times 10^{-48}$  |
| GSTO1    | rs1147611  | 10 | 106025258 | G | T  | -1.06 | 0.03 | $5.37 \times 10^{-163}$ |
| GSTP1    | rs1695     | 11 | 67352689  | A | G  | -0.79 | 0.03 | $1.64 \times 10^{-106}$ |
| GSTT2B   | rs5751777  | 22 | 24267047  | C | T  | -0.32 | 0.04 | $5.28 \times 10^{-13}$  |
| GXYLT1   | rs11181303 | 12 | 42437801  | A | T  | -0.34 | 0.06 | $8.50 \times 10^{-9}$   |
| GZMB     | rs8192918  | 14 | 25101878  | C | CT | -0.97 | 0.04 | $5.96 \times 10^{-85}$  |
| GZMM     | rs3760874  | 19 | 544315    | A | G  | 0.39  | 0.05 | $4.21 \times 10^{-14}$  |
| H6PD     | rs7555568  | 1  | 9292606   | G | A  | -0.60 | 0.04 | $1.35 \times 10^{-39}$  |
| HAPLN1   | rs13160212 | 5  | 83219474  | T | C  | 1.07  | 0.03 | $8.74 \times 10^{-145}$ |
| HAPLN4   | rs2965187  | 19 | 19522970  | T | A  | 0.24  | 0.03 | $1.12 \times 10^{-18}$  |
| HAVCR2   | rs6873507  | 5  | 156529747 | A | G  | -0.74 | 0.04 | $5.99 \times 10^{-67}$  |
| HDGF     | rs12145743 | 1  | 156700651 | T | G  | -0.29 | 0.03 | $3.18 \times 10^{-18}$  |
| HGF      | rs10248271 | 7  | 81417306  | T | G  | -0.25 | 0.04 | $1.64 \times 10^{-8}$   |
| HGFAC    | rs2498323  | 4  | 3451109   | G | A  | -1.28 | 0.06 | $7.43 \times 10^{-82}$  |
| HIBCH    | rs291466   | 2  | 191184475 | A | G  | 0.62  | 0.03 | $7.34 \times 10^{-72}$  |
| HK2      | rs640944   | 2  | 75046839  | T | G  | -0.22 | 0.04 | $1.73 \times 10^{-8}$   |
| HLA-DQA2 | rs557011   | 6  | 32587013  | C | T  | 0.53  | 0.04 | $1.72 \times 10^{-42}$  |
| HMOX2    | rs79848476 | 16 | 4829602   | T | C  | 0.37  | 0.07 | $2.74 \times 10^{-8}$   |
| HP       | rs217184   | 16 | 72105965  | T | C  | 0.82  | 0.05 | $8.95 \times 10^{-46}$  |
| HRG      | rs9898     | 3  | 186390627 | C | T  | 0.47  | 0.04 | $6.26 \times 10^{-27}$  |
| HSD17B14 | rs35299026 | 19 | 49318380  | G | A  | -0.97 | 0.10 | $4.23 \times 10^{-22}$  |
| HSP90B1  | rs1177457  | 12 | 104336127 | C | T  | 1.02  | 0.02 | $6.31 \times 10^{-199}$ |
| HYAL1    | rs78138837 | 3  | 50344178  | A | G  | 0.72  | 0.07 | $7.47 \times 10^{-22}$  |
| IBSP     | rs2627692  | 4  | 88649369  | C | T  | -0.27 | 0.05 | $4.58 \times 10^{-8}$   |
| ICAM1    | rs5498     | 19 | 10395683  | A | G  | -0.70 | 0.03 | $1.32 \times 10^{-106}$ |
| ICAM4    | rs901886   | 19 | 10402131  | T | C  | 0.16  | 0.03 | $4.22 \times 10^{-9}$   |

|         |             |    |           |   |      |       |      |                         |
|---------|-------------|----|-----------|---|------|-------|------|-------------------------|
| ICOSLG  | rs112451903 | 21 | 45683369  | A | ACTG | -0.30 | 0.04 | $4.51 \times 10^{-14}$  |
| IDUA    | rs56079856  | 4  | 994011    | G | T    | 0.90  | 0.06 | $1.62 \times 10^{-49}$  |
| IFNAR1  | rs2257167   | 21 | 34715699  | G | C    | -1.16 | 0.03 | $3.14 \times 10^{-174}$ |
| IFNL1   | rs30461     | 19 | 39789115  | A | G    | 0.43  | 0.06 | $3.12 \times 10^{-11}$  |
| IFNL3   | rs28416813  | 19 | 39735644  | C | G    | -0.32 | 0.04 | $8.34 \times 10^{-15}$  |
| IFNLR1  | rs10903035  | 1  | 24481940  | G | A    | 0.25  | 0.04 | $1.75 \times 10^{-9}$   |
| IGDCC3  | rs525514    | 15 | 65615556  | T | C    | 0.39  | 0.03 | $9.08 \times 10^{-34}$  |
| IGDCC4  | rs8034057   | 15 | 65789430  | G | A    | -0.55 | 0.09 | $3.70 \times 10^{-10}$  |
| IGF2R   | rs629849    | 6  | 160494409 | A | G    | 0.99  | 0.05 | $2.63 \times 10^{-75}$  |
| IGFBPL1 | rs148002733 | 9  | 38852172  | G | A    | 0.58  | 0.05 | $1.75 \times 10^{-30}$  |
| IGFLR1  | rs12459634  | 19 | 36230174  | T | C    | -0.64 | 0.04 | $5.28 \times 10^{-47}$  |
| IGHG1   | rs57446317  | 14 | 106206565 | C | G    | 0.81  | 0.07 | $1.93 \times 10^{-29}$  |
| IGHG2   | rs57446317  | 14 | 106206565 | C | G    | 0.81  | 0.07 | $1.93 \times 10^{-29}$  |
| IGHG3   | rs57446317  | 14 | 106206565 | C | G    | 0.81  | 0.07 | $1.93 \times 10^{-29}$  |
| IGHG4   | rs57446317  | 14 | 106206565 | C | G    | 0.81  | 0.07 | $1.93 \times 10^{-29}$  |
| IGSF11  | rs2903250   | 3  | 118649060 | G | T    | 0.81  | 0.03 | $9.25 \times 10^{-138}$ |
| IL10RA  | rs3135932   | 11 | 117864063 | A | G    | -0.57 | 0.05 | $3.21 \times 10^{-24}$  |
| IL10RB  | rs2515717   | 21 | 34662282  | G | A    | 0.52  | 0.04 | $5.01 \times 10^{-31}$  |
| IL12B   | rs2546890   | 5  | 158759900 | A | G    | 0.51  | 0.05 | $2.20 \times 10^{-27}$  |
| IL15RA  | rs8177641   | 10 | 6016892   | A | G    | 0.59  | 0.04 | $6.70 \times 10^{-39}$  |
| IL16    | rs4778639   | 15 | 81600451  | T | G    | -0.69 | 0.09 | $2.88 \times 10^{-15}$  |
| IL17D   | rs2314714   | 13 | 21270132  | C | A    | -0.53 | 0.09 | $2.32 \times 10^{-9}$   |
| IL17RA  | rs3827279   | 22 | 17595929  | G | C    | 0.72  | 0.05 | $6.31 \times 10^{-44}$  |
| IL17RB  | rs62252978  | 3  | 53949262  | T | C    | 0.37  | 0.06 | $2.99 \times 10^{-9}$   |
| IL17RC  | rs6765503   | 3  | 9964826   | A | G    | 0.39  | 0.04 | $1.55 \times 10^{-25}$  |
| IL17RD  | rs35934471  | 3  | 57145830  | C | CA   | -1.02 | 0.03 | $2.61 \times 10^{-140}$ |
| IL18R1  | rs12996505  | 2  | 102931802 | A | G    | -1.01 | 0.02 | $1.64 \times 10^{-194}$ |
| IL1R1   | rs11689480  | 2  | 102674501 | G | A    | 0.32  | 0.04 | $1.40 \times 10^{-18}$  |
| IL1RAP  | rs6444442   | 3  | 190346060 | A | G    | -1.45 | 0.05 | $1.61 \times 10^{-128}$ |
| IL1RL1  | rs7568913   | 2  | 102920037 | T | C    | -1.05 | 0.03 | $2.86 \times 10^{-148}$ |

|         |            |    |           |   |    |       |      |                         |
|---------|------------|----|-----------|---|----|-------|------|-------------------------|
| IL1RL2  | rs1922292  | 2  | 102829013 | C | A  | -0.39 | 0.04 | $3.23 \times 10^{-26}$  |
| IL1RN   | rs56341434 | 2  | 113868990 | T | C  | -0.25 | 0.04 | $4.45 \times 10^{-9}$   |
| IL20    | rs1150258  | 1  | 207074905 | T | C  | -0.21 | 0.03 | $4.97 \times 10^{-10}$  |
| IL22    | rs4144961  | 12 | 68656647  | T | A  | 0.69  | 0.04 | $3.51 \times 10^{-69}$  |
| IL27RA  | rs35026308 | 19 | 14153293  | T | C  | -1.05 | 0.04 | $4.14 \times 10^{-118}$ |
| IL2RB   | rs228953   | 22 | 37531436  | G | A  | 0.30  | 0.04 | $1.43 \times 10^{-12}$  |
| IL34    | rs35794088 | 16 | 70666796  | C | T  | -0.52 | 0.04 | $1.35 \times 10^{-30}$  |
| IL5RA   | rs7619345  | 3  | 3138841   | G | A  | 0.51  | 0.05 | $6.27 \times 10^{-27}$  |
| IL6     | rs10274260 | 7  | 22844846  | A | G  | 0.44  | 0.05 | $1.22 \times 10^{-17}$  |
| IL6R    | rs2228145  | 1  | 154426970 | A | C  | 1.06  | 0.03 | $1.89 \times 10^{-194}$ |
| IL6ST   | rs35257381 | 5  | 55318612  | A | T  | 0.20  | 0.03 | $1.52 \times 10^{-10}$  |
| IL9     | rs31551    | 5  | 135275330 | G | A  | 0.56  | 0.04 | $1.08 \times 10^{-43}$  |
| IMPAD1  | rs62511997 | 8  | 57859634  | C | T  | -0.42 | 0.04 | $1.85 \times 10^{-21}$  |
| INPP5B  | rs579689   | 1  | 38256166  | G | A  | -0.52 | 0.04 | $1.91 \times 10^{-36}$  |
| INSR    | rs4804774  | 19 | 7772173   | G | C  | 0.19  | 0.03 | $1.91 \times 10^{-9}$   |
| IRF2    | rs793785   | 4  | 185368274 | A | C  | 0.33  | 0.05 | $5.73 \times 10^{-12}$  |
| ISG15   | rs1921     | 1  | 949608    | G | A  | 0.41  | 0.03 | $5.92 \times 10^{-36}$  |
| ITGB5   | rs34410053 | 3  | 124442738 | G | T  | 0.30  | 0.05 | $1.80 \times 10^{-9}$   |
| ITIH4   | rs34092621 | 3  | 52887861  | A | AT | 0.22  | 0.04 | $8.61 \times 10^{-9}$   |
| ITIH5   | rs41298373 | 10 | 7622009   | G | A  | -0.96 | 0.06 | $1.02 \times 10^{-49}$  |
| JAM2    | rs11909849 | 21 | 27168099  | C | G  | -0.19 | 0.03 | $9.08 \times 10^{-11}$  |
| JAM3    | rs6590735  | 11 | 134022087 | G | T  | 0.19  | 0.03 | $2.03 \times 10^{-8}$   |
| JAML    | rs1540191  | 11 | 118090432 | G | A  | 1.19  | 0.02 | $2.41 \times 10^{-240}$ |
| KDR     | rs34495369 | 4  | 56122001  | G | A  | -0.31 | 0.04 | $3.99 \times 10^{-13}$  |
| KIRREL3 | rs11220650 | 11 | 126760652 | A | G  | -0.20 | 0.02 | $5.67 \times 10^{-26}$  |
| KLK10   | rs62115757 | 19 | 51521821  | T | G  | -1.02 | 0.04 | $7.27 \times 10^{-103}$ |
| KLK11   | rs1048328  | 19 | 51527364  | G | A  | -1.39 | 0.06 | $8.81 \times 10^{-87}$  |
| KLK12   | rs3745540  | 19 | 51535130  | A | G  | -0.24 | 0.04 | $2.48 \times 10^{-8}$   |
| KLK13   | rs2569476  | 19 | 51569548  | C | T  | -0.51 | 0.08 | $3.03 \times 10^{-11}$  |
| KLK14   | rs3810091  | 19 | 51568690  | C | T  | 0.37  | 0.06 | $4.55 \times 10^{-10}$  |

|        |            |    |           |   |    |       |      |                         |
|--------|------------|----|-----------|---|----|-------|------|-------------------------|
| KLK15  | rs5519     | 19 | 51322312  | T | C  | -0.65 | 0.04 | $4.41 \times 10^{-45}$  |
| KLK7   | rs1654526  | 19 | 51482459  | G | A  | 0.93  | 0.05 | $1.25 \times 10^{-56}$  |
| KLK8   | rs2659074  | 19 | 51495579  | T | G  | -0.34 | 0.04 | $2.90 \times 10^{-14}$  |
| KLKB1  | rs2304595  | 4  | 187172280 | G | A  | 0.35  | 0.04 | $2.78 \times 10^{-19}$  |
| KLRB1  | rs2241006  | 12 | 9748209   | T | A  | -0.71 | 0.04 | $3.06 \times 10^{-60}$  |
| KNG1   | rs5030049  | 3  | 186450863 | T | C  | -0.91 | 0.06 | $7.80 \times 10^{-51}$  |
| KYNU   | rs12477146 | 2  | 143793814 | G | A  | -0.32 | 0.05 | $9.25 \times 10^{-12}$  |
| LAMC2  | rs2276543  | 1  | 183155305 | G | A  | 1.24  | 0.03 | $7.80 \times 10^{-208}$ |
| LAYN   | rs663763   | 11 | 111422217 | C | T  | 0.61  | 0.03 | $6.42 \times 10^{-89}$  |
| LBP    | rs2232613  | 20 | 36997655  | C | T  | -1.04 | 0.07 | $2.21 \times 10^{-40}$  |
| LCT    | rs4988235  | 2  | 136608646 | G | A  | 0.98  | 0.04 | $1.88 \times 10^{-114}$ |
| LCTL   | rs7403574  | 15 | 66857290  | C | T  | -0.40 | 0.06 | $1.45 \times 10^{-11}$  |
| LEAP2  | rs59414721 | 5  | 132322505 | T | TG | 0.41  | 0.05 | $3.64 \times 10^{-16}$  |
| LECT2  | rs31530    | 5  | 135282630 | C | T  | -0.33 | 0.03 | $3.86 \times 10^{-22}$  |
| LEPR   | rs12077336 | 1  | 66069986  | G | T  | -1.38 | 0.03 | $4.25 \times 10^{-188}$ |
| LGALS2 | rs6000806  | 22 | 37971179  | T | C  | -0.25 | 0.04 | $2.09 \times 10^{-10}$  |
| LGALS3 | rs76426991 | 14 | 55600939  | G | A  | -1.22 | 0.07 | $2.43 \times 10^{-64}$  |
| LGALS8 | rs34299988 | 1  | 236701748 | C | T  | 0.67  | 0.04 | $6.48 \times 10^{-66}$  |
| LGALS9 | rs4239242  | 17 | 25974258  | T | C  | -0.33 | 0.04 | $8.74 \times 10^{-16}$  |
| LGMN   | rs9791     | 14 | 93170993  | C | T  | 0.27  | 0.04 | $8.19 \times 10^{-11}$  |
| LHB    | rs78537284 | 19 | 49515363  | G | A  | -0.96 | 0.07 | $2.60 \times 10^{-36}$  |
| LIFR   | rs327287   | 5  | 38642552  | G | T  | 0.18  | 0.03 | $2.41 \times 10^{-10}$  |
| LILRA4 | rs79828899 | 19 | 54853749  | C | T  | 1.18  | 0.08 | $8.28 \times 10^{-42}$  |
| LILRA6 | rs11668526 | 19 | 54749060  | C | T  | 0.64  | 0.04 | $3.27 \times 10^{-42}$  |
| LILRB1 | rs10427127 | 19 | 55143982  | T | C  | -1.55 | 0.07 | $1.12 \times 10^{-86}$  |
| LILRB2 | rs7247451  | 19 | 54782704  | G | C  | 0.62  | 0.04 | $3.33 \times 10^{-50}$  |
| LILRB5 | rs12975366 | 19 | 54759361  | T | C  | -1.07 | 0.03 | $5.53 \times 10^{-180}$ |
| LMAN2L | rs72809820 | 2  | 97360079  | C | T  | 0.29  | 0.02 | $1.05 \times 10^{-29}$  |
| LMOD1  | rs2644112  | 1  | 201806106 | T | C  | -0.23 | 0.04 | $1.83 \times 10^{-8}$   |
| LPO    | rs7219860  | 17 | 56321271  | G | A  | -0.48 | 0.05 | $8.30 \times 10^{-23}$  |

|         |             |    |           |           |   |       |      |                         |
|---------|-------------|----|-----------|-----------|---|-------|------|-------------------------|
| LRIT2   | rs4562751   | 10 | 85978723  | T         | A | 0.41  | 0.05 | $1.47 \times 10^{-13}$  |
| LRP11   | rs7763718   | 6  | 150186534 | T         | G | 0.39  | 0.02 | $1.11 \times 10^{-77}$  |
| LRP12   | rs28627996  | 8  | 105585028 | C         | T | -0.22 | 0.04 | $7.06 \times 10^{-9}$   |
| LRP2    | rs10201691  | 2  | 170069028 | G         | A | 0.43  | 0.07 | $1.27 \times 10^{-10}$  |
| LRP8    | rs79395289  | 1  | 53734037  | TG        | T | 0.36  | 0.02 | $2.43 \times 10^{-68}$  |
| LRRC15  | rs6799819   | 3  | 194089549 | T         | C | 0.70  | 0.07 | $1.37 \times 10^{-23}$  |
| LRRC32  | rs1320644   | 11 | 76370187  | G         | A | -0.25 | 0.04 | $4.58 \times 10^{-9}$   |
| LRRN1   | rs35362954  | 3  | 3887508   | C         | G | -0.54 | 0.05 | $5.60 \times 10^{-24}$  |
| LTF     | rs55950019  | 3  | 46511644  | T         | A | 1.11  | 0.03 | $3.78 \times 10^{-173}$ |
| LY86    | rs7757934   | 6  | 6578927   | G         | A | 0.47  | 0.05 | $2.46 \times 10^{-20}$  |
| LY9     | rs1333064   | 1  | 160763600 | G         | A | 0.33  | 0.05 | $1.32 \times 10^{-12}$  |
| LY96    | rs2929505   | 8  | 74879827  | C         | T | -0.29 | 0.05 | $1.17 \times 10^{-8}$   |
| LYPLAL1 | rs147082275 | 1  | 219454644 | TAAA<br>G | T | 0.41  | 0.07 | $7.92 \times 10^{-10}$  |
| LYZ     | rs4761234   | 12 | 69732105  | T         | C | -0.74 | 0.03 | $4.58 \times 10^{-90}$  |
| MAGI2   | rs7779312   | 7  | 78116661  | G         | A | 0.10  | 0.02 | $2.98 \times 10^{-10}$  |
| MAN2B2  | rs2301790   | 4  | 6600012   | A         | G | 1.14  | 0.03 | $2.68 \times 10^{-167}$ |
| MANBA   | rs223492    | 4  | 103675108 | G         | C | 0.38  | 0.04 | $6.00 \times 10^{-24}$  |
| MANEA   | rs35772543  | 6  | 96053922  | T         | A | -1.59 | 0.05 | $3.36 \times 10^{-142}$ |
| MANF    | rs6778196   | 3  | 51770429  | C         | T | -0.38 | 0.06 | $3.96 \times 10^{-10}$  |
| MANSC4  | rs9668702   | 12 | 27919491  | T         | G | 0.89  | 0.04 | $4.31 \times 10^{-87}$  |
| MAPK13  | rs12210904  | 6  | 36098191  | C         | A | 0.35  | 0.04 | $2.78 \times 10^{-15}$  |
| MATN4   | rs11086956  | 20 | 43924106  | T         | C | -0.59 | 0.04 | $1.85 \times 10^{-43}$  |
| MAX     | rs10143198  | 14 | 65555471  | C         | T | -0.23 | 0.03 | $4.07 \times 10^{-11}$  |
| MBL2    | rs7096206   | 10 | 54531685  | G         | C | 0.79  | 0.05 | $5.04 \times 10^{-57}$  |
| MCEE    | rs4852762   | 2  | 71373036  | C         | T | -0.43 | 0.04 | $1.92 \times 10^{-24}$  |
| MESD    | rs11855057  | 15 | 81282144  | C         | G | -0.39 | 0.05 | $2.84 \times 10^{-15}$  |
| METTL24 | rs13218597  | 6  | 110679736 | A         | G | 0.44  | 0.03 | $9.92 \times 10^{-36}$  |
| MFAP2   | rs2284746   | 1  | 17306675  | C         | G | 0.64  | 0.04 | $4.24 \times 10^{-48}$  |
| MGP     | rs2430737   | 12 | 15035563  | T         | C | 0.35  | 0.04 | $1.40 \times 10^{-16}$  |



|        |             |    |           |                      |    |       |      |                         |
|--------|-------------|----|-----------|----------------------|----|-------|------|-------------------------|
| MIA    | rs2607412   | 19 | 41268243  | A                    | G  | 0.73  | 0.08 | $5.47 \times 10^{-19}$  |
| MICA   | rs9281428   | 6  | 31378227  | C                    | CT | -1.08 | 0.03 | $8.03 \times 10^{-154}$ |
| MICB   | rs9266244   | 6  | 31325692  | G                    | A  | 0.86  | 0.05 | $8.03 \times 10^{-49}$  |
| MIF    | rs2070766   | 22 | 24237221  | C                    | G  | -0.34 | 0.05 | $3.70 \times 10^{-12}$  |
| MLN    | rs55775340  | 6  | 33751784  | C                    | G  | -0.34 | 0.05 | $2.53 \times 10^{-10}$  |
| MMEL1  | rs4648652   | 1  | 2535758   | A                    | G  | 1.16  | 0.03 | $5.28 \times 10^{-167}$ |
| MMP10  | rs486055    | 11 | 102650424 | C                    | T  | -0.67 | 0.06 | $7.72 \times 10^{-28}$  |
| MMP12  | rs114176245 | 11 | 102719534 | C                    | T  | -0.54 | 0.06 | $2.79 \times 10^{-16}$  |
| MMP2   | rs1561220   | 16 | 55504568  | A                    | G  | 0.56  | 0.06 | $3.20 \times 10^{-21}$  |
| MMP7   | rs79643393  | 11 | 102410668 | C                    | T  | 1.25  | 0.08 | $9.51 \times 10^{-47}$  |
| MMP8   | rs2155052   | 11 | 102595666 | C                    | G  | -1.32 | 0.06 | $8.31 \times 10^{-84}$  |
| MPIG6B | rs11575845  | 6  | 31692386  | C                    | G  | -1.14 | 0.08 | $7.17 \times 10^{-40}$  |
| MRC1   | rs201259350 | 10 | 17852064  | TAGA<br>A            | T  | -0.38 | 0.05 | $5.62 \times 10^{-14}$  |
| MRC2   | rs138105166 | 17 | 60704973  | TCCT<br>CCCT<br>CCGC | T  | -0.33 | 0.04 | $9.58 \times 10^{-15}$  |
| MSMB   | rs10993994  | 10 | 51549496  | T                    | C  | 0.85  | 0.03 | $1.37 \times 10^{-117}$ |
| MSMP   | rs10758322  | 9  | 35776190  | C                    | T  | -0.59 | 0.04 | $9.41 \times 10^{-52}$  |
| MST1   | rs11130213  | 3  | 49712297  | C                    | T  | -1.12 | 0.03 | $4.99 \times 10^{-187}$ |
| MTHFS  | rs149183525 | 15 | 80168321  | AAAA<br>T            | A  | -0.66 | 0.04 | $3.07 \times 10^{-48}$  |
| MXRA7  | rs720782    | 17 | 74682602  | C                    | T  | -0.35 | 0.03 | $1.05 \times 10^{-36}$  |
| MXRA8  | rs307346    | 1  | 1260733   | A                    | C  | 0.39  | 0.07 | $2.22 \times 10^{-8}$   |
| NAAA   | rs7686066   | 4  | 76838858  | A                    | T  | -0.87 | 0.04 | $2.73 \times 10^{-88}$  |
| NAGK   | rs2287327   | 2  | 71297982  | C                    | T  | -0.29 | 0.03 | $1.41 \times 10^{-17}$  |
| NAGPA  | rs12599777  | 16 | 5079466   | A                    | G  | -0.36 | 0.04 | $2.32 \times 10^{-20}$  |
| NBL1   | rs2854108   | 1  | 19973920  | A                    | G  | -0.32 | 0.02 | $1.32 \times 10^{-45}$  |
| NCAM2  | rs2009029   | 21 | 22855892  | A                    | G  | 0.32  | 0.03 | $4.61 \times 10^{-21}$  |
| NCR1   | rs77273876  | 19 | 55400971  | G                    | A  | 1.23  | 0.08 | $5.52 \times 10^{-44}$  |
| NCR3   | rs986475    | 6  | 31556709  | A                    | G  | -0.56 | 0.06 | $6.56 \times 10^{-22}$  |
| NDNF   | rs6840113   | 4  | 121936507 | A                    | G  | 0.49  | 0.04 | $5.48 \times 10^{-31}$  |

|        |             |    |           |   |      |       |      |                         |
|--------|-------------|----|-----------|---|------|-------|------|-------------------------|
| NDST1  | rs2545341   | 5  | 149914401 | T | C    | 0.22  | 0.03 | $1.01 \times 10^{-14}$  |
| NELL1  | rs79474191  | 11 | 20953407  | C | T    | 1.16  | 0.08 | $2.57 \times 10^{-45}$  |
| NID1   | rs9662380   | 1  | 236178606 | G | A    | -0.34 | 0.05 | $4.20 \times 10^{-13}$  |
| NID2   | rs140170580 | 14 | 52494307  | T | TA   | -0.70 | 0.05 | $3.36 \times 10^{-40}$  |
| NMB    | rs34452033  | 15 | 85221993  | A | G    | -0.33 | 0.04 | $5.02 \times 10^{-17}$  |
| NPNT   | rs34712979  | 4  | 106819053 | G | A    | -0.35 | 0.05 | $8.20 \times 10^{-12}$  |
| NPPB   | rs12402728  | 1  | 11922148  | A | G    | 0.53  | 0.05 | $8.81 \times 10^{-28}$  |
| NPW    | rs3785284   | 16 | 2074036   | A | G    | -0.78 | 0.04 | $1.19 \times 10^{-65}$  |
| NQO1   | rs112668868 | 16 | 69713957  | C | G    | -1.00 | 0.04 | $2.79 \times 10^{-93}$  |
| NQO2   | rs2756078   | 6  | 3010103   | G | A    | 0.98  | 0.04 | $9.61 \times 10^{-102}$ |
| NRG1   | rs10089448  | 8  | 32597355  | C | A    | -0.50 | 0.06 | $1.25 \times 10^{-14}$  |
| NRG4   | rs35468194  | 15 | 76349565  | T | TA   | 1.26  | 0.03 | $2.96 \times 10^{-169}$ |
| NRP1   | rs2506149   | 10 | 33480713  | C | T    | -0.33 | 0.03 | $7.98 \times 10^{-23}$  |
| NRP2   | rs11678440  | 2  | 206548443 | T | C    | -0.17 | 0.03 | $4.32 \times 10^{-8}$   |
| NT5C   | rs111346516 | 17 | 73603700  | G | A    | -0.40 | 0.06 | $2.70 \times 10^{-11}$  |
| NTM    | rs12790269  | 11 | 131148713 | G | A    | 0.13  | 0.02 | $6.33 \times 10^{-15}$  |
| NTN1   | rs940854    | 17 | 8934763   | C | T    | -0.28 | 0.04 | $2.32 \times 10^{-13}$  |
| NTN4   | rs7959545   | 12 | 96059957  | G | C    | 0.80  | 0.05 | $5.31 \times 10^{-46}$  |
| NTRK1  | rs2365715   | 1  | 156615114 | A | G    | -0.43 | 0.04 | $1.01 \times 10^{-22}$  |
| NUCB1  | rs2017135   | 19 | 49383269  | C | T    | -0.44 | 0.06 | $3.37 \times 10^{-12}$  |
| NUDCD3 | rs306997    | 7  | 44538882  | A | G    | 0.45  | 0.03 | $2.74 \times 10^{-37}$  |
| NUDT9  | rs58601962  | 4  | 88384477  | A | AC   | -0.51 | 0.06 | $3.06 \times 10^{-18}$  |
| OAF    | rs2508490   | 11 | 120099679 | G | A    | -0.87 | 0.05 | $1.72 \times 10^{-58}$  |
| OAS1   | rs10850097  | 12 | 113361117 | C | T    | -0.48 | 0.04 | $1.07 \times 10^{-34}$  |
| OLFM1  | rs546682    | 9  | 137970302 | C | T    | -0.22 | 0.03 | $4.97 \times 10^{-12}$  |
| OLFM2  | rs1862474   | 19 | 10096650  | T | C    | 0.42  | 0.04 | $6.33 \times 10^{-21}$  |
| OLFML3 | rs3841011   | 1  | 114521683 | A | AAAC | 0.34  | 0.05 | $2.24 \times 10^{-12}$  |
| OLR1   | rs17808009  | 12 | 10311929  | C | T    | 0.18  | 0.03 | $7.39 \times 10^{-11}$  |
| OMD    | rs117800660 | 9  | 95174368  | A | T    | -0.47 | 0.08 | $9.14 \times 10^{-9}$   |
| OSCAR  | rs254252    | 19 | 54594864  | G | A    | 0.52  | 0.08 | $9.23 \times 10^{-11}$  |

|          |            |    |           |    |   |       |      |                         |
|----------|------------|----|-----------|----|---|-------|------|-------------------------|
| OSMR     | rs72732754 | 5  | 38999995  | A  | T | -0.31 | 0.04 | $1.19 \times 10^{-11}$  |
| PAM      | rs34274728 | 5  | 102306489 | CT | C | -0.47 | 0.03 | $1.56 \times 10^{-40}$  |
| PCBD1    | rs2630336  | 10 | 72648422  | G  | T | -0.26 | 0.04 | $5.40 \times 10^{-13}$  |
| PCDH10   | rs1112105  | 4  | 133894412 | T  | G | 0.21  | 0.03 | $2.30 \times 10^{-14}$  |
| PCOLCE2  | rs2707975  | 3  | 142611657 | A  | G | 0.78  | 0.05 | $5.27 \times 10^{-50}$  |
| PCSK1    | rs6234     | 5  | 95728974  | G  | C | -0.83 | 0.03 | $9.39 \times 10^{-122}$ |
| PCSK7    | rs236910   | 11 | 117081974 | A  | G | -1.13 | 0.03 | $2.24 \times 10^{-151}$ |
| PCSK9    | rs41294819 | 1  | 55504586  | A  | G | -0.85 | 0.05 | $1.39 \times 10^{-49}$  |
| PDCD1LG2 | rs62556118 | 9  | 5515990   | G  | C | 0.53  | 0.04 | $2.60 \times 10^{-41}$  |
| PDCD5    | rs4499344  | 19 | 33073431  | G  | A | 0.25  | 0.03 | $1.17 \times 10^{-13}$  |
| PDGFD    | rs10444324 | 11 | 104095391 | A  | C | 0.42  | 0.04 | $8.55 \times 10^{-21}$  |
| PDGFRB   | rs3816018  | 5  | 149508475 | C  | T | 1.14  | 0.02 | $4.59 \times 10^{-308}$ |
| PDGFRL   | rs2720579  | 8  | 17432466  | G  | A | -0.83 | 0.05 | $1.06 \times 10^{-51}$  |
| PDLIM4   | rs4877     | 5  | 131607588 | G  | T | -0.38 | 0.05 | $2.34 \times 10^{-14}$  |
| PENK     | rs1877571  | 8  | 57426778  | A  | C | 0.46  | 0.04 | $3.19 \times 10^{-26}$  |
| PGD      | rs72867415 | 1  | 10416602  | G  | A | -0.68 | 0.08 | $1.52 \times 10^{-17}$  |
| PIGR     | rs533494   | 1  | 207117575 | C  | T | 0.42  | 0.05 | $1.57 \times 10^{-16}$  |
| PILRA    | rs1859788  | 7  | 99971834  | A  | G | -1.29 | 0.03 | $1.02 \times 10^{-204}$ |
| PKDCC    | rs10495892 | 2  | 42156206  | G  | C | 0.24  | 0.04 | $4.13 \times 10^{-8}$   |
| PLA2G2A  | rs11573156 | 1  | 20306146  | G  | C | 0.29  | 0.05 | $7.72 \times 10^{-9}$   |
| PLA2G7   | rs1421378  | 6  | 46703513  | A  | G | 0.79  | 0.03 | $1.19 \times 10^{-94}$  |
| PLA2R1   | rs3749117  | 2  | 160885442 | T  | C | -0.97 | 0.03 | $3.91 \times 10^{-122}$ |
| PLAUR    | rs4760     | 19 | 44153100  | A  | G | -0.26 | 0.03 | $2.00 \times 10^{-14}$  |
| PLD5     | rs72761220 | 1  | 242267176 | A  | T | 0.32  | 0.05 | $2.30 \times 10^{-12}$  |
| PLEK     | rs3816281  | 2  | 68607947  | G  | T | 0.36  | 0.04 | $4.56 \times 10^{-17}$  |
| PLOD2    | rs1707466  | 3  | 145850024 | G  | A | -0.36 | 0.04 | $3.70 \times 10^{-20}$  |
| PLXDC2   | rs7094178  | 10 | 20105223  | G  | A | 0.27  | 0.03 | $3.81 \times 10^{-18}$  |
| PLXNB2   | rs28573806 | 22 | 50727792  | T  | C | -1.22 | 0.02 | $2.23 \times 10^{-308}$ |
| PLXNC1   | rs12313790 | 12 | 94632933  | C  | A | -0.39 | 0.06 | $5.99 \times 10^{-10}$  |
| PNLIPRP2 | rs7910135  | 10 | 118398046 | C  | A | 0.82  | 0.03 | $4.86 \times 10^{-93}$  |

|         |             |    |           |    |       |       |      |                         |
|---------|-------------|----|-----------|----|-------|-------|------|-------------------------|
| POFUT1  | rs76143353  | 20 | 30815755  | C  | T     | -1.11 | 0.09 | $7.73 \times 10^{-33}$  |
| POGLUT1 | rs6794833   | 3  | 119191398 | T  | C     | -0.65 | 0.04 | $2.74 \times 10^{-62}$  |
| POGLUT3 | rs111559044 | 11 | 108254454 | G  | C     | -0.69 | 0.09 | $2.89 \times 10^{-13}$  |
| POMC    | rs3754861   | 2  | 25393722  | A  | C     | 0.37  | 0.06 | $7.04 \times 10^{-11}$  |
| POMGNT2 | rs2002182   | 3  | 43147538  | T  | G     | -0.26 | 0.04 | $8.36 \times 10^{-12}$  |
| POSTN   | rs9547910   | 13 | 38069999  | G  | A     | -0.58 | 0.04 | $3.79 \times 10^{-43}$  |
| PPID    | rs6856561   | 4  | 159621185 | A  | T     | 0.43  | 0.03 | $1.29 \times 10^{-31}$  |
| PPIE    | rs1046988   | 1  | 40219065  | C  | T     | -0.45 | 0.03 | $4.74 \times 10^{-42}$  |
| PPIF    | rs11002931  | 10 | 81094251  | A  | C     | -0.47 | 0.04 | $3.83 \times 10^{-24}$  |
| PPT1    | rs112524162 | 1  | 40576715  | G  | T     | -0.93 | 0.10 | $1.26 \times 10^{-20}$  |
| PRKCSH  | rs160839    | 19 | 11557697  | T  | C     | -0.25 | 0.04 | $2.07 \times 10^{-11}$  |
| PROS1   | rs5013930   | 3  | 93679707  | T  | C     | 0.35  | 0.05 | $1.28 \times 10^{-10}$  |
| PRTN3   | rs6510982   | 19 | 845535    | C  | G     | 0.33  | 0.04 | $2.47 \times 10^{-14}$  |
| PSG3    | rs4030933   | 19 | 43237764  | T  | G     | -0.42 | 0.04 | $1.16 \times 10^{-24}$  |
| PSG9    | rs140022160 | 19 | 43784407  | C  | CCCTT | 0.40  | 0.05 | $2.52 \times 10^{-13}$  |
| PSMB1   | rs3734763   | 6  | 170885912 | T  | C     | -0.36 | 0.03 | $6.32 \times 10^{-37}$  |
| PSPN    | rs6510895   | 19 | 6391847   | C  | T     | 0.43  | 0.04 | $1.23 \times 10^{-20}$  |
| PTGFRN  | rs4233450   | 1  | 117490261 | G  | T     | 0.87  | 0.04 | $1.08 \times 10^{-78}$  |
| PTGR1   | rs56912703  | 9  | 114357659 | T  | A     | -0.42 | 0.04 | $8.62 \times 10^{-21}$  |
| PTH     | rs78157059  | 11 | 13691962  | C  | G     | -0.45 | 0.07 | $9.70 \times 10^{-12}$  |
| PTHLH   | rs10843110  | 12 | 28289141  | T  | G     | -0.29 | 0.05 | $3.76 \times 10^{-10}$  |
| PTPN4   | rs11896956  | 2  | 120135332 | A  | G     | -0.49 | 0.06 | $4.95 \times 10^{-17}$  |
| PTPRU   | rs212297    | 1  | 29723516  | C  | T     | -0.42 | 0.03 | $8.55 \times 10^{-37}$  |
| PXYLP1  | rs6786821   | 3  | 140999276 | C  | G     | 0.47  | 0.04 | $1.14 \times 10^{-25}$  |
| QDPR    | rs4698602   | 4  | 17519712  | G  | A     | -0.36 | 0.04 | $2.29 \times 10^{-15}$  |
| QPCT    | rs12467820  | 2  | 37572806  | G  | T     | -0.46 | 0.03 | $2.63 \times 10^{-51}$  |
| QPCTL   | rs2110574   | 19 | 46197421  | C  | T     | 0.16  | 0.03 | $1.27 \times 10^{-9}$   |
| QSOX1   | rs12371     | 1  | 180163390 | A  | G     | -0.52 | 0.05 | $3.82 \times 10^{-28}$  |
| QSOX2   | rs3758199   | 9  | 139097645 | C  | T     | -0.25 | 0.03 | $2.63 \times 10^{-14}$  |
| RABEPK  | rs147332108 | 9  | 127911299 | TA | T     | 1.05  | 0.04 | $1.72 \times 10^{-107}$ |

|         |            |    |           |     |            |       |      |                         |
|---------|------------|----|-----------|-----|------------|-------|------|-------------------------|
| RAET1L  | rs6557222  | 6  | 150300478 | A   | G          | -0.46 | 0.05 | $3.67 \times 10^{-18}$  |
| RARRES1 | rs6441224  | 3  | 158450417 | T   | C          | 0.42  | 0.05 | $8.46 \times 10^{-19}$  |
| RARRES2 | rs28432021 | 7  | 150046235 | G   | C          | 0.72  | 0.05 | $1.41 \times 10^{-45}$  |
| RBP7    | rs3811458  | 1  | 10057203  | G   | T          | -0.61 | 0.06 | $1.90 \times 10^{-22}$  |
| REG1A   | rs76841471 | 2  | 79330169  | T   | G          | 0.50  | 0.08 | $2.91 \times 10^{-10}$  |
| REG3G   | rs436758   | 2  | 79247510  | T   | C          | 0.67  | 0.04 | $2.84 \times 10^{-45}$  |
| REG4    | rs58163904 | 1  | 120365410 | GCA | G          | -0.45 | 0.05 | $5.07 \times 10^{-19}$  |
| RGMA    | rs11858429 | 15 | 93844067  | C   | T          | 0.21  | 0.03 | $2.87 \times 10^{-11}$  |
| RIDA    | rs7846130  | 8  | 99109401  | A   | G          | -0.23 | 0.02 | $1.61 \times 10^{-24}$  |
| RMDN1   | rs10107571 | 8  | 87518985  | G   | T          | -1.04 | 0.02 | $6.71 \times 10^{-229}$ |
| RNASE2  | rs2233859  | 14 | 21359808  | C   | A          | 0.63  | 0.04 | $4.16 \times 10^{-59}$  |
| RNASE3  | rs11299601 | 14 | 21349400  | AG  | A          | -0.67 | 0.05 | $3.39 \times 10^{-38}$  |
| RNASE4  | rs944438   | 14 | 21164627  | A   | G          | -0.32 | 0.04 | $4.98 \times 10^{-15}$  |
| RNASE6  | rs1045922  | 14 | 21250124  | G   | A          | 1.23  | 0.03 | $8.93 \times 10^{-240}$ |
| ROBO2   | rs74506149 | 3  | 77580700  | A   | C          | -0.28 | 0.04 | $3.28 \times 10^{-12}$  |
| ROBO3   | rs55706177 | 11 | 124746180 | C   | T          | 0.38  | 0.05 | $1.44 \times 10^{-14}$  |
| ROR1    | rs61765448 | 1  | 64611828  | C   | T          | -0.45 | 0.04 | $2.18 \times 10^{-24}$  |
| ROR2    | rs4744097  | 9  | 94543365  | G   | A          | 0.25  | 0.03 | $7.41 \times 10^{-15}$  |
| RPE     | rs2887872  | 2  | 210878117 | C   | T          | -0.25 | 0.03 | $6.63 \times 10^{-19}$  |
| RPN1    | rs2712419  | 3  | 128340896 | T   | C          | -0.51 | 0.02 | $1.79 \times 10^{-79}$  |
| RRM2B   | rs2305832  | 8  | 103266805 | C   | A          | 0.52  | 0.06 | $2.43 \times 10^{-15}$  |
| RSPO2   | rs593872   | 8  | 108941705 | G   | A          | 0.54  | 0.04 | $2.56 \times 10^{-42}$  |
| RSPO4   | rs4813028  | 20 | 1096630   | T   | C          | 0.36  | 0.06 | $2.49 \times 10^{-8}$   |
| S100A4  | rs1005436  | 1  | 153521932 | G   | A          | 0.55  | 0.07 | $3.96 \times 10^{-15}$  |
| S100A7  | rs3006490  | 1  | 153369009 | A   | C          | -1.07 | 0.09 | $1.86 \times 10^{-28}$  |
| SAA1    | rs10690148 | 11 | 18293504  | C   | CAACT<br>T | -0.94 | 0.04 | $4.53 \times 10^{-87}$  |
| SAT2    | rs11078700 | 17 | 7511936   | A   | G          | -0.55 | 0.07 | $1.50 \times 10^{-14}$  |
| SCARA3  | rs2640734  | 8  | 27532654  | C   | T          | -0.31 | 0.05 | $3.08 \times 10^{-9}$   |
| SCARB2  | rs78466149 | 4  | 76393394  | G   | A          | -0.31 | 0.06 | $4.95 \times 10^{-8}$   |

|          |             |    |           |      |           |       |      |                         |
|----------|-------------|----|-----------|------|-----------|-------|------|-------------------------|
| SCARF1   | rs145220082 | 17 | 1545567   | T    | C         | 1.44  | 0.05 | $9.67 \times 10^{-116}$ |
| SCARF2   | rs10606665  | 22 | 20776973  | AACC | A         | 0.32  | 0.05 | $1.55 \times 10^{-9}$   |
| SCG3     | rs1456297   | 15 | 51964210  | C    | A         | 0.34  | 0.04 | $4.77 \times 10^{-14}$  |
| SCGN     | rs4419666   | 6  | 25693274  | C    | T         | 0.40  | 0.05 | $5.65 \times 10^{-18}$  |
| SCT      | rs79177795  | 11 | 644748    | C    | G         | 0.70  | 0.06 | $8.66 \times 10^{-26}$  |
| SCUBE1   | rs138993    | 22 | 43610207  | A    | G         | 0.25  | 0.04 | $1.95 \times 10^{-8}$   |
| SELL     | rs2223286   | 1  | 169665632 | T    | C         | -0.66 | 0.04 | $3.99 \times 10^{-51}$  |
| SELP     | rs6128      | 1  | 169562904 | C    | T         | -0.66 | 0.05 | $3.16 \times 10^{-33}$  |
| SEMA3E   | rs3801487   | 7  | 83033915  | T    | C         | -1.19 | 0.05 | $1.99 \times 10^{-109}$ |
| SEMA3G   | rs34135146  | 3  | 52313432  | G    | C         | -0.29 | 0.04 | $1.73 \times 10^{-11}$  |
| SEMA4D   | rs45464494  | 9  | 91994433  | C    | T         | -0.79 | 0.05 | $2.89 \times 10^{-47}$  |
| SERPINA1 | rs1243167   | 14 | 94841641  | G    | A         | 0.28  | 0.05 | $2.40 \times 10^{-8}$   |
| SERPINA4 | rs10140765  | 14 | 95023389  | C    | T         | 0.36  | 0.04 | $1.57 \times 10^{-16}$  |
| SERPINA5 | rs885786    | 14 | 95050496  | C    | G         | 0.40  | 0.04 | $2.43 \times 10^{-20}$  |
| SERPINA9 | rs12896629  | 14 | 94940361  | G    | T         | 0.16  | 0.03 | $3.39 \times 10^{-9}$   |
| SERPINB1 | rs386713    | 6  | 2842139   | C    | T         | -0.40 | 0.04 | $2.39 \times 10^{-27}$  |
| SERPIND1 | rs6004023   | 22 | 21065285  | A    | G         | 0.38  | 0.04 | $1.80 \times 10^{-19}$  |
| SERPINE1 | rs2227674   | 7  | 100776208 | A    | G         | 0.32  | 0.05 | $3.88 \times 10^{-9}$   |
| SERPINF1 | rs12450371  | 17 | 1667674   | C    | T         | -0.51 | 0.04 | $1.93 \times 10^{-29}$  |
| SERPING1 | rs11229075  | 11 | 57391023  | A    | C         | 0.84  | 0.04 | $1.20 \times 10^{-82}$  |
| SFRP4    | rs17236800  | 7  | 37944375  | A    | G         | -0.33 | 0.05 | $8.07 \times 10^{-10}$  |
| SHBG     | rs12452603  | 17 | 7504977   | T    | C         | 0.30  | 0.05 | $1.19 \times 10^{-8}$   |
| SIGLEC12 | rs4801871   | 19 | 52002317  | G    | C         | -1.35 | 0.04 | $1.01 \times 10^{-141}$ |
| SIGLEC14 | rs147859411 | 19 | 52130148  | T    | TTTT<br>G | -1.12 | 0.06 | $2.60 \times 10^{-62}$  |
| SIGLEC5  | rs147859411 | 19 | 52130148  | T    | TTTT<br>G | -1.16 | 0.06 | $5.75 \times 10^{-78}$  |
| SIGLEC6  | rs2305771   | 19 | 52033572  | T    | C         | 0.31  | 0.05 | $6.18 \times 10^{-11}$  |
| SIGLEC7  | rs12983058  | 19 | 51642784  | G    | T         | 1.20  | 0.03 | $1.44 \times 10^{-170}$ |
| SIGLEC9  | rs2075803   | 19 | 51628529  | A    | G         | -1.18 | 0.02 | $1.09 \times 10^{-240}$ |
| SIRPA    | rs6075340   | 20 | 1894335   | G    | A         | -1.17 | 0.03 | $5.81 \times 10^{-196}$ |

|                |             |    |           |   |    |       |      |                         |
|----------------|-------------|----|-----------|---|----|-------|------|-------------------------|
| SIRPB1         | rs2318043   | 20 | 1596473   | A | G  | 1.27  | 0.04 | $4.68 \times 10^{-145}$ |
| SIRPG          | rs17855609  | 20 | 1895813   | A | T  | -0.60 | 0.05 | $1.87 \times 10^{-34}$  |
| SLAMF7         | rs11581248  | 1  | 160720074 | C | T  | -1.21 | 0.06 | $2.92 \times 10^{-74}$  |
| SMOC1          | rs12101270  | 14 | 70463688  | T | C  | -0.41 | 0.04 | $2.46 \times 10^{-19}$  |
| SMPDL3A        | rs9385271   | 6  | 123125411 | T | C  | -0.82 | 0.04 | $3.29 \times 10^{-72}$  |
| SOD3           | rs11938550  | 4  | 24726263  | G | C  | -0.68 | 0.04 | $9.29 \times 10^{-54}$  |
| SORBS3         | rs1047030   | 8  | 22428708  | A | G  | -0.36 | 0.05 | $8.98 \times 10^{-12}$  |
| SORCS2         | rs3892041   | 4  | 7314962   | A | C  | 0.36  | 0.05 | $1.02 \times 10^{-12}$  |
| SOST           | rs9899889   | 17 | 41823225  | T | G  | -0.55 | 0.04 | $2.32 \times 10^{-39}$  |
| SPARCL1        | rs17012853  | 4  | 88454184  | C | T  | -0.35 | 0.05 | $2.82 \times 10^{-13}$  |
| SPAST          | rs79204217  | 2  | 31902450  | T | C  | 0.23  | 0.04 | $2.04 \times 10^{-8}$   |
| SPATA20        | rs8076632   | 17 | 48625928  | C | G  | -0.50 | 0.04 | $2.73 \times 10^{-33}$  |
| SPINK2         | rs781538    | 4  | 57685669  | C | T  | 0.52  | 0.04 | $4.30 \times 10^{-41}$  |
| SPINK6         | rs765776722 | 5  | 147592991 | T | TG | -1.39 | 0.07 | $2.38 \times 10^{-75}$  |
| SPINT1         | rs17658212  | 15 | 41145919  | C | T  | -0.68 | 0.08 | $1.24 \times 10^{-16}$  |
| SPINT2         | rs71354995  | 19 | 38791841  | A | G  | -1.20 | 0.03 | $1.99 \times 10^{-207}$ |
| SPINT3         | rs6017593   | 20 | 44147814  | A | G  | 0.25  | 0.03 | $1.07 \times 10^{-13}$  |
| SPOCK2         | rs1245550   | 10 | 73844081  | A | G  | -0.56 | 0.04 | $3.06 \times 10^{-39}$  |
| SPON1          | rs1528661   | 11 | 13971798  | T | C  | -0.43 | 0.03 | $1.78 \times 10^{-31}$  |
| SPON2          | rs878323    | 4  | 1169813   | G | T  | -0.59 | 0.04 | $1.73 \times 10^{-39}$  |
| ST3GAL1        | rs2142306   | 8  | 134470631 | T | C  | 0.29  | 0.04 | $1.72 \times 10^{-15}$  |
| ST3GAL6        | rs113325534 | 3  | 98786038  | C | T  | -1.45 | 0.08 | $9.24 \times 10^{-64}$  |
| ST6GALNA<br>C1 | rs2286595   | 17 | 74621635  | C | T  | 0.20  | 0.03 | $1.78 \times 10^{-8}$   |
| ST6GALNA<br>C2 | rs10852772  | 17 | 74580421  | G | A  | -0.48 | 0.05 | $4.92 \times 10^{-20}$  |
| ST8SIA2        | rs34728194  | 15 | 93064556  | A | C  | -0.23 | 0.04 | $6.50 \times 10^{-9}$   |
| STC1           | rs138694283 | 8  | 23818092  | C | CT | 0.54  | 0.09 | $2.57 \times 10^{-9}$   |
| STX8           | rs11078801  | 17 | 9337245   | G | C  | 0.12  | 0.02 | $1.00 \times 10^{-11}$  |
| SVEP1          | rs74308641  | 9  | 113313412 | G | A  | -0.58 | 0.08 | $1.08 \times 10^{-13}$  |
| TAC1           | rs10272589  | 7  | 96896639  | G | A  | 0.65  | 0.06 | $3.60 \times 10^{-29}$  |

|          |             |    |           |                      |    |       |      |                         |
|----------|-------------|----|-----------|----------------------|----|-------|------|-------------------------|
| TAPBP    | rs469064    | 6  | 33250476  | C                    | A  | -0.32 | 0.04 | $3.17 \times 10^{-16}$  |
| TAPBPL   | rs2041387   | 12 | 6562823   | C                    | T  | 1.32  | 0.03 | $5.04 \times 10^{-239}$ |
| TAX1BP3  | rs2873624   | 17 | 3563963   | C                    | G  | -0.25 | 0.04 | $1.86 \times 10^{-10}$  |
| TBCE     | rs868815    | 1  | 235584543 | C                    | G  | -0.18 | 0.03 | $3.87 \times 10^{-11}$  |
| TBL2     | rs76029572  | 7  | 72992858  | C                    | G  | 1.28  | 0.08 | $2.03 \times 10^{-51}$  |
| TCN2     | rs12169610  | 22 | 31022590  | C                    | T  | -0.72 | 0.06 | $6.36 \times 10^{-28}$  |
| TDGF1    | rs80045772  | 3  | 46619238  | T                    | A  | 1.22  | 0.03 | $9.62 \times 10^{-237}$ |
| TEK      | rs16911092  | 9  | 27142444  | A                    | G  | 0.98  | 0.07 | $2.82 \times 10^{-36}$  |
| TFF1     | rs3761376   | 21 | 43787038  | G                    | A  | -0.32 | 0.05 | $4.15 \times 10^{-9}$   |
| TGFB1    | rs57948035  | 19 | 41882044  | CAAA<br>A            | C  | 0.23  | 0.03 | $3.81 \times 10^{-14}$  |
| TGFB2    | rs7533619   | 1  | 219346409 | C                    | T  | -0.21 | 0.04 | $5.04 \times 10^{-9}$   |
| TGFB3    | rs11621464  | 14 | 76379798  | C                    | G  | 0.43  | 0.06 | $8.35 \times 10^{-14}$  |
| TGM3     | rs214830    | 20 | 2321105   | G                    | C  | 0.42  | 0.05 | $5.78 \times 10^{-18}$  |
| THBS2    | rs7341189   | 6  | 169622734 | G                    | A  | 0.26  | 0.05 | $1.68 \times 10^{-8}$   |
| THBS3    | rs4072037   | 1  | 155162067 | C                    | T  | -0.34 | 0.04 | $2.53 \times 10^{-14}$  |
| THBS4    | rs256438    | 5  | 79366249  | T                    | G  | 0.53  | 0.04 | $4.95 \times 10^{-33}$  |
| THSD1    | rs191768    | 13 | 53152704  | T                    | C  | -0.46 | 0.08 | $2.72 \times 10^{-8}$   |
| TIE1     | rs1199039   | 1  | 43784956  | A                    | G  | -0.24 | 0.03 | $1.68 \times 10^{-12}$  |
| TIGAR    | rs143427116 | 12 | 4430340   | AGCC<br>GGCC<br>GGCT | A  | 0.60  | 0.07 | $1.37 \times 10^{-15}$  |
| TLR4     | rs4986791   | 9  | 120475602 | C                    | T  | -1.05 | 0.06 | $5.43 \times 10^{-65}$  |
| TMED2    | rs786430    | 12 | 124087988 | G                    | C  | -0.34 | 0.03 | $4.04 \times 10^{-33}$  |
| TMEM106B | rs4721060   | 7  | 12267552  | G                    | A  | -0.37 | 0.03 | $2.15 \times 10^{-42}$  |
| TMEM132A | rs55920775  | 11 | 60703777  | G                    | A  | 0.45  | 0.03 | $2.41 \times 10^{-57}$  |
| TMEM132C | rs7313554   | 12 | 128791042 | T                    | C  | 0.16  | 0.02 | $6.27 \times 10^{-11}$  |
| TMEM132D | rs12372807  | 12 | 129561332 | G                    | A  | 0.22  | 0.04 | $1.25 \times 10^{-8}$   |
| TMEM190  | rs4806666   | 19 | 55888095  | C                    | T  | -1.14 | 0.03 | $2.15 \times 10^{-172}$ |
| TMEM25   | rs200268771 | 11 | 118446875 | G                    | GT | -0.51 | 0.09 | $2.54 \times 10^{-9}$   |
| TMEM9    | rs2365296   | 1  | 201114196 | C                    | T  | -0.77 | 0.02 | $3.62 \times 10^{-217}$ |
| TMPRSS5  | rs11315692  | 11 | 113616733 | TG                   | T  | -0.62 | 0.04 | $2.06 \times 10^{-51}$  |



|               |             |    |           |    |    |       |      |                         |
|---------------|-------------|----|-----------|----|----|-------|------|-------------------------|
| TNC           | rs1138545   | 9  | 117835899 | C  | T  | 1.38  | 0.06 | $2.85 \times 10^{-100}$ |
| TNFAIP6       | rs34026490  | 2  | 152205792 | T  | C  | 0.33  | 0.04 | $5.93 \times 10^{-15}$  |
| TNFRSF10<br>B | rs4871844   | 8  | 22879734  | T  | C  | 0.45  | 0.03 | $1.36 \times 10^{-41}$  |
| TNFRSF11<br>A | rs884205    | 18 | 60054857  | A  | C  | -0.43 | 0.03 | $1.93 \times 10^{-41}$  |
| TNFRSF14      | rs2281852   | 1  | 2490942   | C  | A  | 0.36  | 0.02 | $1.24 \times 10^{-56}$  |
| TNFRSF18      | rs12066716  | 1  | 1123434   | T  | A  | -0.43 | 0.04 | $4.00 \times 10^{-21}$  |
| TNFRSF19      | rs3751364   | 13 | 24234517  | A  | G  | 0.27  | 0.04 | $4.70 \times 10^{-11}$  |
| TNFRSF1B      | rs616645    | 1  | 12240824  | T  | G  | -0.25 | 0.04 | $7.23 \times 10^{-9}$   |
| TNFRSF4       | rs190796582 | 1  | 1167796   | C  | T  | 0.60  | 0.07 | $1.00 \times 10^{-16}$  |
| TNFRSF8       | rs3830887   | 1  | 12066218  | T  | TA | 0.50  | 0.04 | $2.72 \times 10^{-34}$  |
| TNFSF13B      | rs1224148   | 13 | 108956794 | A  | G  | 0.40  | 0.05 | $5.00 \times 10^{-14}$  |
| TNFSF15       | rs7848647   | 9  | 117569046 | T  | C  | -0.53 | 0.04 | $4.25 \times 10^{-41}$  |
| TNFSF8        | rs4979474   | 9  | 117695984 | G  | A  | -0.26 | 0.04 | $8.36 \times 10^{-9}$   |
| TNXB          | rs201459441 | 6  | 31962708  | AC | A  | -0.62 | 0.09 | $1.35 \times 10^{-11}$  |
| TPSAB1        | rs112332886 | 16 | 1288563   | G  | A  | 1.20  | 0.07 | $5.25 \times 10^{-50}$  |
| TPSB2         | rs112332886 | 16 | 1288563   | G  | A  | 1.37  | 0.07 | $2.28 \times 10^{-73}$  |
| TREM1         | rs9462692   | 6  | 41262236  | A  | C  | -0.72 | 0.05 | $1.67 \times 10^{-47}$  |
| TRH           | rs2670897   | 3  | 129699722 | C  | T  | 0.64  | 0.05 | $4.18 \times 10^{-33}$  |
| TRIL          | rs3735562   | 7  | 28996557  | C  | T  | -0.47 | 0.05 | $1.06 \times 10^{-20}$  |
| TXNDC15       | rs3733897   | 5  | 134223593 | A  | G  | 1.10  | 0.06 | $3.45 \times 10^{-72}$  |
| TXNRD1        | rs11111979  | 12 | 104680782 | C  | G  | -0.13 | 0.02 | $4.15 \times 10^{-9}$   |
| TYMP          | rs140522    | 22 | 50971266  | T  | C  | 0.29  | 0.03 | $8.16 \times 10^{-21}$  |
| UCMA          | rs2399954   | 10 | 13276368  | G  | A  | -0.85 | 0.05 | $3.08 \times 10^{-53}$  |
| ULBP2         | rs6557222   | 6  | 150300478 | A  | G  | -0.35 | 0.05 | $7.33 \times 10^{-11}$  |
| ULBP3         | rs12661513  | 6  | 150373839 | C  | A  | -1.01 | 0.05 | $1.26 \times 10^{-75}$  |
| UNC5C         | rs10516960  | 4  | 96159677  | T  | G  | 0.15  | 0.02 | $2.78 \times 10^{-9}$   |
| UST           | rs1384668   | 6  | 149223723 | C  | G  | -0.38 | 0.03 | $6.60 \times 10^{-26}$  |
| VASN          | rs886858    | 16 | 4422122   | A  | G  | 0.40  | 0.05 | $2.92 \times 10^{-16}$  |
| VIT           | rs11124542  | 2  | 36994439  | A  | C  | 0.50  | 0.03 | $1.17 \times 10^{-50}$  |

|         |            |    |           |   |   |       |      |                         |
|---------|------------|----|-----------|---|---|-------|------|-------------------------|
| VSIR    | rs9415993  | 10 | 73514911  | G | C | 0.57  | 0.04 | $3.79 \times 10^{-42}$  |
| VTN     | rs704      | 17 | 26694861  | G | A | 1.11  | 0.02 | $2.76 \times 10^{-243}$ |
| VWA2    | rs11196687 | 10 | 116059728 | G | A | -0.75 | 0.05 | $6.72 \times 10^{-41}$  |
| WARS1   | rs4905953  | 14 | 100810426 | G | A | 0.36  | 0.04 | $6.37 \times 10^{-20}$  |
| WFDC1   | rs12448765 | 16 | 84425214  | A | G | -0.30 | 0.05 | $4.00 \times 10^{-11}$  |
| WFIKKN1 | rs8062289  | 16 | 681284    | C | T | 0.80  | 0.05 | $5.91 \times 10^{-59}$  |
| WFIKKN2 | rs7225019  | 17 | 48915879  | G | A | -1.06 | 0.04 | $7.23 \times 10^{-121}$ |
| XCL1    | rs1323532  | 1  | 168496272 | G | T | 0.27  | 0.04 | $1.41 \times 10^{-9}$   |
| ZG16B   | rs4785908  | 16 | 2879279   | T | C | 0.56  | 0.05 | $6.04 \times 10^{-32}$  |
